1 **Single-cell transcriptome maps of myeloid blood cell lineages in *Drosophila***

2

3 Bumsik Cho<sup>1#</sup>, Sang-Ho Yoon<sup>1#</sup>, Daewon Lee<sup>1</sup>, Ferdinand Koranteng<sup>1</sup>, Sudhir

4 Gopal Tattikota<sup>2</sup>, Nuri Cha<sup>1</sup>, Mingyu Shin<sup>1</sup>, Hobin Do<sup>1</sup>, Yanhui Hu<sup>2</sup>, Sue Young Oh<sup>3</sup>,

5 Seok Jun Moon<sup>3</sup>, Norbert Perrimon<sup>2,4</sup>, Jin-Wu Nam<sup>1,5,6\*</sup> and Jiwon Shim<sup>1,5,6\*†</sup>

6

7 <sup>1</sup>Department of Life Sciences, College of Natural Science, Hanyang University,

8 Seoul 04736, Republic of Korea

9 <sup>2</sup>Department of Genetics, Harvard Medical School, Boston, MA 02115, USA

10 <sup>3</sup>Department of Oral Biology, Yonsei University, College of Dentistry, Seoul

11 03722, Republic of Korea

12 <sup>4</sup>Howard Hughes Medical Institute, Boston, MA 02115, USA

13 <sup>5</sup>Research Institute for Natural Sciences, Hanyang University, Seoul 04736,

14 Republic of Korea

15 <sup>6</sup>Research Institute for Convergence of Basic Sciences, Hanyang University, Seoul

16 04736, Republic of Korea

17

18 #These authors contributed equally to the work

19 † Lead contact

20 \* Corresponding authors: [jshim@hanyang.ac.kr](mailto:jshim@hanyang.ac.kr); [jwnam@hanyang.ac.kr](mailto:jwnam@hanyang.ac.kr)

21

22

23 **Key words:** *Drosophila*, hemocyte, myeloid blood, lymph gland, single-cell RNA

24 sequencing, wasp infestation, hematopoietic stem cell, plasmatocyte, crystal cell,

25 lamellocyte, hematopoiesis, innate immunity, Seurat, Drop-seq

26 **SUMMARY**

27 *Drosophila* lymph gland, the larval hematopoietic organ comprised of  
28 prohemocytes and hemocytes, has been a valuable model for understanding  
29 mechanisms underlying hematopoiesis and immunity. Three types of mature  
30 hemocytes have been characterized in the lymph gland: plasmatocytes,  
31 lamellocytes, and crystal cells, which are analogous to vertebrate myeloid cells.  
32 Here, we used single-cell RNA sequencing to comprehensively analyze  
33 heterogeneity of developing hemocytes in the lymph gland, and discovered novel  
34 hemocyte types, stem-like prohemocytes, and intermediate prohemocytes.  
35 Additionally, we identified the emergence of the lamellocyte lineage following  
36 active cellular immunity caused by wasp infestation. We unraveled similarities  
37 and differences between embryonically derived- and larval lymph gland  
38 hemocytes. Finally, the comparison of *Drosophila* lymph gland hemocytes and  
39 human immune cells highlights similarities between prohemocytes and  
40 hematopoietic stem cell, and between mature hemocytes and myeloid cells  
41 across species. Altogether, our study provides detailed insights on the  
42 development and evolution of hematopoiesis at single-cell resolution.

## 43 INTRODUCTION

44 Blood cells are highly specialized cells that play crucial roles such as  
45 elimination of foreign threats during immune responses and retaining memories  
46 of immunological events (Sakaguchi et al., 2010). In vertebrates, the multifaceted  
47 immune system is composed of two lineages, phagocytic myeloid and memory-  
48 dependent lymphoid lineages, to allow holistic and cooperative defense of  
49 animals (Weissman et al., 2001). Blood cells in *Drosophila*, collectively called  
50 hemocytes, are reminiscent of myeloid-lineage blood cells in vertebrates  
51 (Banerjee et al., 2019; Crozatier and Vincent, 2011; Gold and Bruckner, 2014),  
52 and are represented by at least three morphologically distinct hemocyte  
53 populations: plasmatocytes (PM), crystal cells (CC), and lamellocytes (LM).  
54 Plasmatocytes, which comprise ~95 % of the hemocytes, play a role in  
55 phagocytosis, tissue remodeling, and cellular immune responses – much like  
56 macrophages, their vertebrate counterparts (Franc et al., 1996; Irving et al.,  
57 2005; Kocks et al., 2005; Kurucz et al., 2007). Crystal cells account for ~5 % of  
58 the blood population and are characterized by crystalline inclusions made up of  
59 prophenoloxidase (ProPO), an enzyme responsible for activating the  
60 melanization cascade (Binggeli et al., 2014; Gajewski et al., 2007; Lebestky et al.,  
61 2000; Tang et al., 2006). Finally, lamellocytes, which are seldom seen in healthy  
62 animals grown at normal conditions, mostly differentiate upon parasitic wasp  
63 infestation or environmental challenges (Anderl et al., 2016; Honti et al., 2014;  
64 Rizki and Rizki, 1984; Sorrentino et al., 2007; Xavier and Williams, 2011).

65 Blood development in vertebrates involves the primitive and definitive  
66 waves of hematopoiesis (Galloway and Zon, 2003). Reminiscent of vertebrate  
67 hematopoiesis, two hematopoietic waves have been described during *Drosophila*

68 development, embryonic and larval definitive hematopoiesis (Evans et al., 2003;  
69 Hartenstein, 2006). Embryonic hematopoiesis initiates in the head mesoderm of  
70 stage-7-embryos and gives rise to hemocytes that migrate throughout the  
71 embryo (Holz et al., 2003; Tepass et al., 1994). Upon hatching, embryonically  
72 derived hemocytes spread throughout the larva with one hemocyte population  
73 freely circulating in the hemolymph and the other colonizing local  
74 microenvironments including segmentally repeated hematopoietic pockets of  
75 the larval body wall (Leitao and Sucena, 2015; Makhijani et al., 2011).

76 Definitive hematopoiesis is initiated from hemangioblast-like cells in the  
77 embryonic cardiogenic mesoderm, which give rise to the larval lymph gland  
78 (Mandal et al., 2004). Medially located prohemocytes, which sustain the  
79 developmental potential to give rise to all three mature hemocyte types,  
80 constitute the medullary zone (MZ) and continue to proliferate until the early  
81 third instar (Jung et al., 2005). Mature hemocytes emerge at the distal edge of the  
82 lymph gland, the cortical zone (CZ), from mid-second instar (Kocks et al., 2005;  
83 Kroeger et al., 2012). Located between the undifferentiated MZ and the  
84 differentiated CZ, is the intermediate zone (IZ) that contains a group of  
85 differentiating cells expressing markers for both the MZ and the CZ (Krzemien et  
86 al., 2010). The posterior signaling center (PSC), a small group of cells that secrete  
87 various ligands, regulates proper growth of the rest of the lymph gland  
88 (Benmimoun et al., 2015; Krzemien et al., 2007; Mandal et al., 2007). Lymph  
89 glands from healthy larvae reared under normal lab conditions generally follow  
90 fixed developmental states until late third instar. Remarkably, following the  
91 onset of pupariation, the lymph gland disintegrates, allowing hemocytes to  
92 disperse into circulation (Grigorian et al., 2011; Regan et al., 2013).

93 Female wasps attack second-instar larvae via a sharp needle-like  
94 ovipositor that efficiently delivers their eggs (Lemaitre and Hoffmann, 2007;  
95 Yang et al., 2015). Wasp eggs trigger cellular immune responses that accompany  
96 lamellocyte differentiation in both embryonic and lymph gland hemocytes.  
97 Lamellocytes are seen in circulation by 24 hours post-infestation, whereas lymph  
98 gland hemocytes remain intact in their original location. Within 48 hours after  
99 infestation, a massive differentiation of lamellocytes takes place followed by  
100 disruption of the lymph gland (Markus et al., 2009; Sorrentino et al., 2002;  
101 Tokusumi et al., 2009). Hemocytes in the lymph gland eventually dissociate into  
102 circulation, and mature lamellocytes derived from the lymph gland and  
103 hematopoietic pockets encapsulate and neutralize wasp eggs (Irving et al., 2005;  
104 Lanot et al., 2001).

105 The *Drosophila* lymph gland has been largely characterized based on  
106 genetic markers and cellular morphology. However, the molecular  
107 underpinnings of hematopoietic cells such as different states and the gene  
108 regulatory network of each cell type have been less investigated. In addition,  
109 questions as to how prohemocytes and mature hemocytes differentiate into  
110 lamellocytes upon active immunity, and to what extent hemocytes derived from  
111 the embryonic and the lymph gland hematopoiesis differ have been unanswered.  
112 Furthermore, due to the lack of sufficient molecular and genetic information, the  
113 similarity between *Drosophila* hemocytes and vertebrate immune cells remains  
114 to be clarified.

115 Here, we build an atlas of myeloid-like *Drosophila* hemocytes by taking  
116 advantage of single-cell RNA sequencing (scRNA-seq) technology and establish a  
117 detailed map for larval hemocytes in the developing lymph gland. We uncover

118 novel classes of hemocytes and their differentiation trajectories, and describe  
119 molecular and cellular changes of myeloid hemocytes upon immune challenges.  
120 Furthermore, we identify both distinct and common characteristics of hemocytes  
121 originating from embryonic and definitive lineages. We also document the  
122 evolutionary similarities between *Drosophila* hemocytes and human immune  
123 cells. Altogether, our study will stimulate future studies on the function and  
124 evolution of the myeloid blood cell lineage.

## 125 **RESULTS**

### 126 **Single-cell transcriptomic profiling of developing myeloid hemocytes**

127       The lymph gland is the larval hematopoietic organ composed of multiple  
128 hemocyte cell types and states (Banerjee et al., 2019; Crozatier and Vincent,  
129 2011). To understand the cellular diversity of developing myeloid-like  
130 hemocytes in *Drosophila* lymph glands at a single-cell level, we dissected and  
131 dissociated lymph glands at three developmental time points, 72, 96, and 120  
132 hours after egg laying (AEL), and applied single cells to Drop-seq, a droplet-  
133 based microfluidics platform (Macosko et al., 2015) (Figure 1A). Fourteen  
134 independent sequencing libraries, representing 5 each for 72 and 96 h AEL and 4  
135 for 120 h AEL, were prepared for scRNA-seq. We integrated the sequencing  
136 libraries after correcting for batch effects within and between time points using  
137 Seurat3 (Butler et al., 2018; Stuart et al., 2019). Our quality-control pipeline  
138 eliminated cells with outlier unique molecular barcode (UMI) counts, low gene  
139 numbers, high mitochondrial gene contents as well as doublets predicted by  
140 Scrublet (see Methods for details). As a result, a total of 22,645 cells (72 h AEL:  
141 2,321; 96 h AEL: 9,400; 120 h AEL: 10,924 cells) were retained for subsequent  
142 analyses (Figure S1A). The number of cells yielded 5.5 X, 6.8 X, and 2.4 X cell  
143 coverage of one lymph gland lobe at 72, 96, and 120 h AEL, respectively (Figure  
144 1B). The 22,645 high-quality cells exhibited a median of 6,361 transcripts (UMIs)  
145 and 1,477 genes per cell (Table S1; Figure S1B-S1C). In addition, the scRNA-seq  
146 libraries of individual time points corresponded well with genes detected in bulk  
147 RNA-seq ( $\geq 1$  TPM; 8,724, 7,654, and 7,627 genes at 72, 96, and 120 h AEL,  
148 respectively), while undetected remainders displayed low expression levels  
149 (Figure S1D). Furthermore, we validated that the scRNA-seq libraries from 72,

150 96, or 120 h AEL align well with the pseudotime array of each library (Figure  
151 S1E). Altogether, our libraries appear sufficiently complex to reflect the whole  
152 transcriptome of developing hemocytes including minor cell types.

153

#### 154 **Major cell types and transcriptional dynamics of *Drosophila* hematopoiesis**

155 After validating the quality of the single cell libraries, we mapped the cells  
156 to the major zones of the lymph gland (Jung et al., 2005). To explore the major  
157 cell types in the developing lymph gland, we aligned cell clusters from the three  
158 developmental time points using the Louvain algorithm (Blondel et al., 2008)  
159 and visualized the data using a nonlinear dimensionality reduction by *t*-  
160 distributed stochastic neighbor embedding (*t*-SNE) (van der Maaten and Hinton,  
161 2008). We aggregated cell clusters according to the expression of previously  
162 published marker genes by manual curation and identified seven distinctive  
163 groups of isolated hemocytes (Figure 1C; Figure S1F-1G; Table S2). These  
164 clusters include prohemocytes (PH: *Tep4*, *Ance*; 36.2 %), plasmatocytes (PM:  
165 *Hml*, *Pxn*, *NimC1*; 57.6 %), crystal cells (CC: *lz*, *PPO1*, *PPO2*; 1.3 %), lamellocytes  
166 (LM: *atilla*; 1.5 %), the PSC (*Antp*, *col*; 0.9 %), and two additional clusters with  
167 uncharacterized genetic features. One novel cluster is enriched with glutathione-  
168 S-transferase transcripts including *GstD1*, *GstD3*, *GstE1*, *GstE7*, and *GstT1*, that we  
169 named “GST-rich” (1.0 %). The other novel cluster exhibits high expression  
170 levels of phagocytosis receptor-, lipid metabolism-related, and starvation-  
171 induced genes such as *crq*, *eater*, *Sirup*, *LpR2*, and *Lsd-2*. We referred to this  
172 cluster as “adipohemocyte” (1.4 %) based on the name of similar hemocytes in  
173 other insects (Hillyer et al., 2003). We verified the presence of GST-rich and  
174 adipohemocyte cell populations in wild-type lymph glands by confirming the



175 expression of signature genes for these clusters in matched bulk RNA-seq  
176 (Figure S1H). Additionally, we identified cells of the dorsal vessel (DV; 0.1 %) as  
177 an extra non-hemocyte cell type based on previously identified marker genes,  
178 *Mlc1* and *Hand*, for this tissue (Figure 1C; Figure S1G).

179 Separation of clustered cells by developmental time points revealed that  
180 the relative population size of cell clusters changes as the lymph gland matures.  
181 Hemocytes in the lymph gland at 72 h AEL are subdivided into two major  
182 groups—prohemocytes and plasmatocytes, with a virtually identical ratio of  
183 49.8 % and 46.1 %, respectively (Figure 1D-1E). As the lymph gland matures, the  
184 proportion of plasmatocytes exceeds that of prohemocytes, and only 30 % of the  
185 hemocytes retain the prohemocyte signature at 120 h AEL (Figure 1D-1E). This  
186 result is consistent with proportional changes of prohemocytes or plasmatocytes  
187 visualized by marker gene expression during development *in vivo* (Figure S1F).  
188 Different from plasmatocytes emerging from 72 h AEL, crystal cells and GST-rich  
189 cells first appear at 96 h AEL, and lamellocytes and adipohemocytes appear later  
190 at 120 h AEL (Figure 1D-1E). The PSC maintains constant cell numbers and  
191 relative ratios across lymph gland development (Figure 1E). Due to temporal  
192 discrepancies in the emergence of mature hemocytes, we observed that most  
193 cells at 72 h AEL overlap well with cells in subsequent time points, while cells at  
194 96 and 120 h AEL segregate from those of preceding points on the *t*-SNE plot  
195 (Figure S1I). These results were reproduced by an independent analysis using  
196 UMAP and an alternative batch correction method (Figure S1J, see Methods for  
197 more details).

198 To better characterize the major cell types and transitions in gene  
199 regulatory networks during lymph gland development, we applied SCENIC, an

200 algorithm that reconstructs gene regulatory networks and identifies cell states  
201 from scRNA-seq data (Aibar et al., 2017). We identified previously recognized  
202 transcriptional regulators such as *jumu*, *Antp*, and *kn* (also known as *collier*) in  
203 the PSC; *srp* in plasmatocytes; and *lz* and *Su(H)* in crystal cells (Figure S1K)  
204 (Crozatier et al., 2004; Hao and Jin, 2017; Lebestky et al., 2003; Mandal et al.,  
205 2007). Moreover, we characterized transcription factors in well-known  
206 complexes or pathways in each cell type. In prohemocytes, we detected  
207 transcription factors of DREAM (Sadasivam and DeCaprio, 2013), a protein  
208 complex responsible for cell cycle regulation, including *E2F2* and *Dp*, and the Dpp  
209 pathway transcription factor *Mad* at 96 to 120 h AEL (Figure S1K).  
210 Plasmatocytes, on the other hand, utilize distinctive transcriptional regulators of  
211 the ecdysone pathway highlighted by *br*, *EcR*, *usp*, *Eip74EF*, and *Hr4*, and stress  
212 responsive genes such as *foxo* and *dl* (Figure S1K). Overall, our single-cell dataset  
213 of the entire lymph gland reliably reveals seven major types of hemocytes (PSC,  
214 prohemocytes, plasmatocytes, crystal cells, lamellocytes, and two newly  
215 identified populations—GST-rich and adipohemocytes). Also, SCENIC analysis  
216 delineates transcriptional transitions of the hemocytes and their regulators at  
217 the single-cell level.

218

### 219 **Heterogeneous populations of lymph gland hemocytes**

220 Our scRNA-seq data prompted us to further catalog the heterogeneity of  
221 primary cell types by performing unsupervised clustering. With subclustering  
222 analysis, we identified eleven subclusters of prohemocytes, ten subclusters of  
223 plasmatocytes, and two subclusters each for lamellocytes and crystal cells  
224 (Figure 2A; Figure S2A). We ensured that each subcluster contains cells from all

225 libraries except stage-specific subsets (Figure S2B). In addition, we excluded  
226 non-hemocyte subclusters enriched with ring gland- or neuron-specific genes  
227 (Figure S2C-S2D). Adipohemocytes split into three subordinate clusters; yet, two  
228 subclusters were library specific, and thus, only one subcluster was considered  
229 relevant and kept for subsequent analyses (Figure S2B). Interestingly, both the  
230 PSC and GST-rich clusters did not split into subclusters (Figure S2A).

231         The majority of prohemocyte subclusters is evenly represented at all  
232 timepoints and maintains high levels of *Tep4* and *Ance* throughout (Figure 2B).  
233 Apart from their constant expression, we identified discrete fluctuations of cell-  
234 cycle regulating genes including *polo*, *Cdk1*, *aurB*, *Det*, *CycB*, and *stg* within  
235 prohemocytes, accompanied by alterations in additional nuclear genes such as  
236 *dUTPase*, *Pen*, and *sle* (Figure 2B). These genes peak at PH1, PH2, and PH4–PH5  
237 within prohemocytes, and a comparable pattern is also present in PM3–PM4  
238 (Figure 2B). There are obvious distinctions between genes involved in the cell  
239 cycle: *stg* and *CycB* are regulators of the G2 phase; *Cdk1* of the G1 phase; and  
240 *polo*, *aurB*, and *Det* are regulators of the M phase (Edgar et al., 1994; Llamazares  
241 et al., 1991; Mathieu et al., 2013; Parry and O'Farrell, 2001). Based on relative  
242 levels of these genes, PH1 is likely to be in G2 and M; PH2 in G2; PH4 in G1; PH5  
243 in M; and PM3 and PM4 in M phase (Figure 2B). Similar to prohemocytes,  
244 plasmatocytes exhibit gradual changes in *vkg*, *NimC1*, and *eater* while keeping  
245 *Hml* and *Pxn* expression high (Figure 2B). PM7 to PM10 express characteristic  
246 signature genes such as *Ama*, *vir-1*, and *crq*, only detected at 120 h AEL (Figure  
247 2A, Figure S2B). Crystal cells are divided into two groups, CC1 and CC2 (Figure  
248 2A). CC1 expresses low levels of *lz* along with the expression of MZ and CZ  
249 markers. However, CC2 is devoid of the MZ or CZ markers and only displays high

250 levels of *PPO1* and *PPO2*, suggesting that CC1 and CC2 correspond to early and  
251 mature crystal cells, respectively (Figure 2A-2B). Similarly, lamellocytes are  
252 separated into premature LM1 and mature LM2 reminiscent of the CC1 and CC2  
253 clusters (Figure 2A-2B).

254 We next sought to identify new markers and characteristic gene  
255 expression patterns in the lymph gland. We confirmed the expression of *Ilp6*, *tau*,  
256 *mthl7*, *brat*, and *chrb* in the PSC; *Men* and *Numb* in crystal cells; and *vir-1* and  
257 *Ama* in plasmatocytes (Figure 2B, Table S2; Figure S2E-S2G). In addition, we  
258 discovered that *zfh1* and *tep2* are expressed in prohemocytes in addition to  
259 representative markers such as *Ance* and *dome* in the MZ (Figure S2H-S2I). *crq*,  
260 *vir-1*, and *Ama* are significantly expressed in both adipohemocytes and mature  
261 plasmatocytes; however, adipohemocytes exhibit high levels of *crq* and *Lsd-2*  
262 while keeping low levels of *NimC1* (Figure 2C). In addition to markers widely  
263 used (Evans et al., 2014; Yu et al., 2018), we identified new enhancer-trap or  
264 MiMIC lines (Nagarkar-Jaiswal et al., 2015) targeting the lymph gland marker  
265 genes (Table S3). Lastly, we confirmed the mRNA expression pattern of  
266 previously reported genes in each subset (Banerjee et al., 2019) (Figure S3J).  
267 Together, we classified 28 transcriptionally distinctive subtypes of hemocytes in  
268 the developing lymph gland and assigned functional descriptions of each subset  
269 based on gene expression patterns. *Bona fide* markers elucidated in each  
270 subcluster collectively provide a valuable resource for further understanding of  
271 myeloid hemocyte development.

272

273 **Trajectory reconstitution and functional networks**

274 Hematopoietic events involving transitions of hemocytes from their stem-  
275 like to final cell types have been a major focus for understanding *Drosophila*  
276 hematopoiesis. Thus, we investigated the time sequence of lymph gland  
277 hematopoiesis by reconstruction of developmental trajectories using Monocle 3  
278 (Cao et al., 2019). For the trajectory analysis, we excluded PSC as the PSC cells do  
279 not give rise to the rest of lymph gland hemocytes (Figure S3A) (Croizatier et al.,  
280 2004; Mandal et al., 2007), and we set the PH1 subcluster as the start point  
281 based on the expression of *Notch*, *shg*, and high levels of mitotic genes (Figure  
282 2B). Pseudotime reconstitution of lymph gland hemocytes displays the main  
283 trajectory from prohemocytes to plasmacytes along with divergent sub-  
284 trajectories towards crystal cells, adipohemocytes, GST-rich, and lamellocytes  
285 (Figure 3A-3B; Video S1). The trajectory corresponds well with on-and-off  
286 patterns of marker genes in the lymph gland (Figure S3B). Moreover, there is an  
287 excellent correlation between the real-time and the pseudotime trajectories  
288 when compared with segregated real-time hemocyte transcriptomes (Figure 3B-  
289 3C, Figure S5C). These analyses validate the *in silico* algorithm-based sequence of  
290 hemocyte differentiation and confidently illustrate the developmental phases of  
291 lymph gland hemocytes.

292 In the major trajectory, we observed a linear trajectory from PH1 to PH3,  
293 projecting towards diverse differentiating states of prohemocytes including PH4-  
294 PH8 and GST-rich (Figure 3A, Figure S3D-S3E). In the later sequence, all the PH  
295 subclusters including the GST-rich merge into PM1 in the trajectory, implying  
296 that GST-rich is a tributary of prohemocytes joining the main PH-to-PM flow  
297 (Figure S3D-S3E). A branch is observed following PM1, producing separable  
298 paths towards either the plasmacyte, the crystal cell, or the lamellocyte

299 lineages. PM3 is biased to the plasmacyte and the crystal cell lineages, while  
300 PM4 gives rise to late plasmacytes, adipohemocytes, and lamellocytes (Figure  
301 S3D-S3E). We also observed a coupling of cell division and differentiation.  
302 Besides PH1 and PH2 subtypes expressing high levels of cell cycle genes, PH4-  
303 PH5 and PM3-PM4 emerge immediately after each divergence (Figure 2B; Figure  
304 S3D-S3E). As an auxiliary route, PH9 and PH11 are distinguishable from PH3 and  
305 bypass the classical PH-to-PM flow to give rise to late plasmacytes or  
306 lamellocytes at 120 h AEL (Figure 3A-3B, Figure S3D-S3E).

307 To address the functional characteristics of the hematopoietic trajectory  
308 and associated subclusters, we examined subtrajectory- and subcluster-specific  
309 gene-expression modules to determine whether subclusters share similar gene  
310 expression modules (Figure S3F). Strikingly, prohemocyte subclusters exhibit  
311 related translation-, metabolism-, and signaling gene expression whereas  
312 plasmacyte subclusters show relatively high levels of extracellular matrix  
313 (ECM), cytoskeletal and immune responsive genes. Crystal cell subclusters  
314 display high levels of genes involved in sugar metabolism, and adipohemocyte  
315 and GST-rich subclusters show fatty acid-related and DNA damage responsive  
316 gene modules, respectively (Figure S3F).

317 We next focused on the transition of prohemocytes into mature  
318 hemocytes and defined subclusters spanning the intermediate zone according to  
319 the trajectory analysis and modular configurations. Given that PH5 and  
320 PM3/PM4 are mitotic and PH6, PH8, PH10, GST-rich, and PM1, subclusters  
321 between PH5 to PM3/PM4, exhibit moderate levels of *Tep4*, *Ance*, *Pxn* and *Hml*,  
322 we hypothesized that PH6, PH8, PH10, GST-rich, and PM1 correspond to  
323 intermediate cell types prior to differentiation. These subclusters are found at

324 all-time points (Figure S2B). We scored highly enriched genes in the potential  
325 intermediate subclusters and noticed that expression of *Nplp2* aligns well with  
326 these cell populations (Figure 2B). Visualizing *Nplp2* in the lymph gland revealed  
327 a partial overlap of *Nplp2* with the MZ marker, *Dome<sup>Meso</sup>*, or the CZ marker, *Pxn*.  
328 However, as *Nplp2* is expressed independently from the late plasmacyte  
329 marker, *NimC1* (Figure S3G), it indicates that *Nplp2* is expressed in the  
330 intermediate zone of the lymph gland, which corresponds to hemocytes in  
331 transition towards differentiation. Altogether, the pseudotime trajectory analysis  
332 provides a detailed basis for prohemocyte differentiation. In addition, we  
333 demonstrate the presence of subclusters in transition, previously described as  
334 the IZ, and their endogenous gene expression.

335

### 336 **Initiation of hematopoiesis in the lymph gland**

337 Prohemocytes have been established as the precursors of lymph gland  
338 hemocytes that produce the entire lymph gland hemocytes (Jung et al., 2005;  
339 Minakhina and Steward, 2010b). Despite previous attempts to understand the  
340 onset of larval hematopoiesis, it has been unclear whether there is a premature  
341 state of prohemocytes reminiscent of mammalian hematopoietic stem cells  
342 (HSCs).

343 To investigate the primordial cell types during lymph gland  
344 hematopoiesis, we focused on the earliest PHs—PH1 and PH2—which initiate  
345 the entire trajectory. We observed that the majority of PH1 is detached from  
346 PH2/PH3 and a subset is connected to PH2 in the trajectory map (Figure 2A, 3A,  
347 Figure S2A, S3B-S3D). Though PH1 and PH2 mark the earliest pseudotime, both  
348 clusters are found at all developmental time points (Figure 3B-3C, Figure S2B).

349 We identified multiple signature genes in the PH1 subcluster (Figure 2B, 3D).  
350 First, we discovered that *Notch* (*N*), its ligand, *Delta* (*DI*), and the *E(Spl)* family  
351 genes, downstream targets of the Notch pathway, are expressed in PH1 (Figure  
352 3D, Figure S4A). Interestingly, cells in PH1 and PH2 are sequentially arrayed  
353 according to on-and-off patterns of *DI* and *N* (Figure 3E, Figure S4B). Second, we  
354 found associations of Hippo, MAPK, Wnt, and Notch pathways with *DI*<sup>+</sup>*N*<sup>+</sup> cells of  
355 PH1 by KEGG pathway analysis (Figure S4B). Third, we observed levels of *dome*,  
356 *hop*, *Stat92E*, and *Socs36E* in PH1, reflecting active JAK/STAT signaling (Figure  
357 3D, Figure S4A-S4B). Strikingly, the expression of Notch/Delta and JAK/STAT-  
358 related genes in PH1 decrease in the succeeding PH2, suggesting that PH1 cells  
359 undergo a drastic change. Fourth, we identified that PH1 does not express *col*  
360 while PH2 exhibits low levels of *col* expression, consistent with previous  
361 observations (Figure S4C)(Benmimoun et al., 2015). Lastly, high levels of cell  
362 cycle genes are detected in both PH1 and PH2, constituting some of the few PH  
363 subclusters actively proliferating in the lymph gland (Figure 2B).

364 Next, we applied SCENIC to further establish gene regulatory networks of  
365 PH1 and PH2 cell populations with PSC as a comparison. SCENIC analysis on the  
366 PSC successfully proved the activity of known transcription factors (Figure 3F).  
367 Moreover, the PH1 subcluster displays transcriptional activity of known  
368 regulators, such as *sd* and *Stat92E*, as well as novel genes, including *jim*, *Psi*, *bowl*,  
369 *esg*, *Tet*, *E(bx)*, and the *E(spl)* family (Figure 3F).

370 We next performed spatial reconstructions for PH1 *in vivo*, and profiled  
371 the expression of genes newly identified in the subset. Interestingly,  
372 *Stat92E::edGFP* is expressed in the cells neighboring the PSC, which are neither  
373 *Tep4*<sup>+</sup> MZ nor *Antp*<sup>+</sup> PSC (Figure 4A, Figure S4D-S4E). Similarly, *Stat92E*<sup>+</sup> cells



374 show close contact with *col*<sup>+</sup> cells without having apparent overlaps (Figure 4B).  
375 The number of *Stat92E*<sup>+</sup> cells increases over development, maintaining relatively  
376 constant ratios of these cells (Figure 4C). Furthermore, *Stat92E*<sup>+</sup> cells are gone  
377 upon genetic ablation of the PSC, which indicates that expression of *Stat92E*<sup>+</sup>  
378 PH1 is dependent upon the PSC (Figure 4D). We additionally detected *Dl* mRNA  
379 or Dl protein expression near the PSC similar to the pattern observed with  
380 *Stat92E::edGFP* (Figure 4E, Figure S4F). The majority of *Dl*<sup>+</sup> cells are *Stat92E*<sup>+</sup>;  
381 however, Dl covers a range broader than a few cell diameters than *Stat92E*<sup>+</sup>  
382 (Figure 4F). We screened Gal4 lines of signature genes in PH1 and identified a  
383 new *Dl* enhancer-trap that marks *Antp*<sup>-</sup> cells adjoining to the PSC, which produce  
384 hemocytes of the entire lymph gland (Figure 4G). To summarize, PH1, the initial  
385 subset of the pseudotime trajectory, indicates a novel subpopulation of  
386 prohemocytes that physically interacts with the PSC and is adjacent to *col*<sup>+</sup> PH2.  
387 PH1 cells do not co-localize with conventional MZ or CZ markers but exhibit  
388 distinctive gene regulatory networks primarily steered by the Delta/Notch and  
389 JAK/STAT pathways. Moreover, these cells retain potentials to give rise to  
390 hemocytes in the lymph gland during 72 to 120 h AEL (Figure 4H). Thus, we  
391 conclude that PH1 is a premature state of prohemocytes reminiscent of  
392 mammalian hematopoietic stem cells (HSCs).

393

#### 394 **Differentiation of lymph gland hemocytes upon wasp infestation**

395 We next investigated emerging heterogeneity and differentiation of the  
396 lymph gland hemocytes upon wasp infestation. We aligned and matched lymph  
397 gland hemocytes from 24 h PI (post-infestation; 96 h AEL) to control hemocytes  
398 using the label transfer, that resulted in the annotation of six hemocyte clusters

399 (iPSC, iPH, iPM, iCC, iLM, and iGST-rich) and 21 subclusters (9 iPHs, 6 iPMs, 2  
400 iCCs, 2 iLMs, iPSC and iGST-rich) when compared to those from controls (Figure  
401 5A-5B; Figure S5A). Consistent with previous studies (Croizatier et al., 2004;  
402 Ferguson and Martinez-Agosto, 2014), wasp infestation significantly reduces  
403 crystal cells (iCCs)—iCC1 and iCC2 (Figure 5A-5B, Figure S5B). A similar decline  
404 is readily observed in iPH1, which is confirmed by the reduction of *Stat92E*<sup>+</sup> or  
405 *Dl*<sup>+</sup> iPH1 in the lymph gland upon wasp infestation (Figure 5C, Figure S5B). In  
406 contrast, iPH4, iPH6, iPH7, iPM1, and iPM4 show a stark increase in numbers and  
407 relative proportions, implying an expansion of differentiating hemocytes upon  
408 wasp infestation (Figure S5B). Coinciding with the increase of differentiating  
409 cells, the lamellocyte and GST-rich populations, which are barely observed  
410 during normal development at 96 h AEL, expand upon wasp infestation (Figure  
411 5A-5B, Figure S5B). Lamellocytes derived upon infestation (iLMs) are  
412 subclustered into two groups: iLM1 and iLM2, which represent immature and  
413 mature iLMs, respectively (Figure S5C). While other cell types undergo  
414 significant modifications upon wasp infestation, we did not detect any changes in  
415 the expression and number of iPSC upon wasp infestation (Figure 5B, Figure  
416 S5D-S5F). When the signature genes of each subcluster are compared to those  
417 from controls, gene expression patterns in general are not altered (Figure S5D).  
418 However, the intermediate cell population already expresses lamellocyte  
419 markers such as *atilla* and *mthl4*, a novel LM marker (Figure S5D). These data  
420 indicate that the active immunity causes a biased commitment of prohemocytes  
421 and plasmatocytes to the lamellocyte lineage.

422 To better understand how iLM differentiates in the lymph gland, we  
423 performed pseudotime trajectory analysis and examined gene modules of

424 related subtypes. Upon the trajectory analysis, we discovered that iLMs are  
425 associated with a wide span of iPHs and iPMs (Figure 5D, Figure S5F-S5G). The  
426 majority of iLMs are directly derived from iPH8 and iPM1 (route 1 and 2 in  
427 Figure 5E), subclusters indicated as the intermediate cell populations (Figure 5E,  
428 Figure S5H). Additionally, an alternative route is generated from iPM6 (route 3  
429 in Figure 5E), the most mature plasmatocyte subcluster at 96 h AEL (Figure 5E,  
430 Figure S5H). We validated the data by tracing the IZ or the CZ markers upon  
431 wasp infestation and confirmed that  $L1^+$  iLMs are derived from either  $Nplp2^+$   
432 intermediate hemocytes or  $Hml^+$  plasmatocytes (Figure 5F). However,  
433 differentiating crystal cells and lamellocyte lineages are mutually exclusive  
434 (Figure S5I). An association of gene-expression modules of each subcluster  
435 indicates the existence of two distinct trajectories to iLMs: iPH8/iPM1-to-iLM  
436 and iPM6-to-iLM (Figure 5E, right). The first iPH8/iPM1-to-iLM wave is enriched  
437 with genes involved in hemocyte proliferation and oxidative phosphorylation  
438 (Figure 5E, right). The second iPM6-to-iLM wave expresses Toll/Imd pathway  
439 and structural genes, demonstrating at least two modes of iLM development in  
440 the lymph gland upon wasp infestation. Overall, we established that the lymph  
441 gland responds to wasp infestation by an expansion of differentiating hemocytes  
442 accompanied by subsequent differentiation of iLMs. In addition to the  
443 differentiation of intermediate populations indicated as iPH8/iPM1-to-iLM in the  
444 trajectory, mature plasmatocytes, iPM6, trans-differentiate into iLMs as an  
445 alternative route amplifying the magnitude of iLM formation.

446

447 **Genetic comparison between two hematopoietic lineages**

448 *Drosophila* hematopoiesis occurs in two waves, and hemocytes  
449 originating from these two lineages differentiate into indistinguishable cell types  
450 (Bazzi et al., 2018; Ghosh et al., 2015; Sanchez Bosch et al., 2019). To distinguish  
451 and compare these two lineages, we compared the larval circulating hemocyte  
452 dataset (see accompanying paper, Tattikota *et al.*) to explore lineage-specific  
453 features of *Drosophila* hemocytes at 96 and 120 h AEL. We performed Seurat  
454 alignment to cluster datasets after adjusting for batch effect. We also excluded  
455 genes related to stress responses that may have been induced during sample  
456 preparation (see Methods for details). As a result, we found that hemocytes from  
457 the lymph gland significantly overlap with those from circulation (Figure 6A,  
458 Figure S6A). We then transferred subcluster labels of lymph gland hemocytes to  
459 circulating hemocytes, and recognized three common cell types: prohemocytes,  
460 plasmatocytes, and crystal cells, all of which consisted of seven subclusters in  
461 circulation (Figure 6B, Figure S6B). Lamellocytes, adipohemocytes, and the PSC  
462 are exclusively found in the lymph gland (Figure 6B). All 67 prohemocytes in  
463 circulation are labeled as PH1 with unique markers (Figure S6B-S6C), albeit in  
464 the absence of Notch and its downstream components (Figure 6C, Figure S5C).  
465 Plasmatocytes in circulation share similarities to PM4, PM5, PM6, and PM7 of the  
466 lymph gland (Figure S5D). Additionally, crystal cells in the lymph gland and in  
467 circulation are nearly identical except for a few genes (Figure S5E-S5F).  
468 Next, we explored the collective signature gene expression of lymph gland  
469 and circulating hemocytes. Besides the genes depicted caused by uneven  
470 proportions (Figure S6A), we identified novel lineage-specific genes including  
471 *28SrRNA-Psi:CR45855* and *28SrRNA-Psi:CR45859* in circulation and *CG44250* and  
472 *CG33460* in the lymph gland (Figure 6C; Figure S6A). When each subcluster was

473 individually compared, circulating plasmatocytes display *Ubx* expression while  
474 plasmatocytes in the lymph gland show *Thor* expression (Figure S5D, S5G-S5I).  
475 Similar differences are observed in crystal cells: *Pde1c*, *CAH2*, and *Naxd* are  
476 higher in circulating crystal cells whereas *Arc2*, *Oscillin*, *aay*, and *fbp* are  
477 significant in crystal cells from the lymph gland (Figure S5E-S5F). Taken  
478 together, hemocytes generated from the two independent lineages appear to be  
479 predominantly similar; however, they are sufficiently genetically distinct that we  
480 can distinguish their ancestries.

481

## 482 **Evolutionary conservation of lymph gland hemocytes**

483         Although functional homologies between *Drosophila* hemocytes and  
484 vertebrate immune cells have been addressed previously (Cooper, 1976; Evans  
485 et al., 2003; Gold and Bruckner, 2014), no system-level comparison has been  
486 reported. Thus, we compared the single-cell transcriptome profiles of six  
487 hematopoietic *Drosophila* cell types including prohemocytes, plasmatocytes,  
488 crystal cells, lamellocytes, GST-rich, and adipohemocytes, with human  
489 hematopoietic lineages from the Human Cell Atlas (HCA) project (Census of  
490 Immune Cells)(Rozenblatt-Rosen et al., 2017). 262,638 high-quality immune  
491 cells were clustered and annotated with 19 well-known immune cell types  
492 (Figure 7A-7B). Following clustering, we observed a clear separation of  
493 lymphoid cells, including T cells and B cells, from the others, while erythroblasts,  
494 B-cell precursors, and granulocyte progenitors are closely linked to  
495 hematopoietic stem cells~multipotent progenitor (HSC~MPP) cluster (Figure  
496 7A-7B).

497 To compare the similarities of gene expression patterns between human  
498 immune cells and *Drosophila* hemocytes, 6,463 orthologous gene pairs were  
499 retrieved, and enrichment of the top 30 signature genes of each hemocyte type  
500 was weighed in human cell types using gene set variance analysis (GSVA) (see  
501 Methods for details). Strikingly, we observed a clear separation into two  
502 lineages, with one cluster consisting of lymphoid-lineage human cells devoid of  
503 *Drosophila* hemocytes, whereas the second one was enriched with myeloid  
504 lineage containing most of the hemocytes (Figure 7C; Table S4). Prohemocytes in  
505 the *Drosophila* lymph gland share similar gene expression with the HSC~MPP  
506 cluster in humans, while mature hemocytes in general are comparable to human  
507 myeloid immune cells (Figure 7C). Specifically, plasmacytes exhibit similar  
508 expression with monocytes, dendritic cells, and platelets, whereas  
509 adipohemocytes resemble more plasma cells (Figure 7C). Both crystal cells and  
510 GST-rich are closely associated with CD14<sup>+</sup> monocytes and classical dendritic  
511 cells (cDC); however, crystal cells are much closer to granulocyte progenitors  
512 than other cell types (Figure 7C). Intriguingly, genetic similarities of *Drosophila*  
513 hemocytes and human myeloid cells are extensively affected when immune-  
514 challenged hemocytes and human immune cells are compared. Plasmacytes  
515 become comparable to HSC~MPP, and, surprisingly, *Drosophila* hemocytes at 24  
516 h post-infestation display striking similarities with lymphoid precursor lineages  
517 such as naïve T cells, T cell precursors, and pro-B cells of humans, implying the  
518 functional duality of active hemocytes beyond their homologies to myeloid cells  
519 (Figure 7D). In conclusion, our analysis demonstrates that *Drosophila* hemocytes  
520 retain conserved genetic characteristics of broad classes of human myeloid

521 immune cells and are plastic enough to show lymphoid-like features upon active  
522 immunity.

## 523 **DISCUSSION**

524           In this study, we report a comprehensive single-cell transcriptome  
525 analysis of 29,618 developing myeloid hemocytes in *Drosophila* lymph glands.  
526 Our analysis provides insights into: 1) the development of myeloid hemocytes at  
527 the single-cell level, 2) the existence of hematopoietic stem-like populations and  
528 adipohemocytes in invertebrates, 3) the differentiation mechanisms of myeloid  
529 hemocytes upon active immunity, 4) the genetic difference of hemocytes derived  
530 from two different hematopoietic ancestries: embryo and larva, and 5) the  
531 evolutionary relevance of *Drosophila* hemocytes. To our knowledge, this study is  
532 the first description of invertebrate myeloid cells at a single-cell level and a  
533 system-level comparison of myeloid cells across species.

534

### 535 **scRNA-seq reveals novel hemocyte types in the lymph gland**

536           Unlike human hematopoietic systems, *Drosophila* hematopoiesis takes  
537 place in a unique hematopoietic organ, the lymph gland, where all developing  
538 myeloid cells are located until histolysis upon pupariation (Grigorian et al.,  
539 2011). Thus, scRNA-seq of the lymph gland allows us to analyze inclusive  
540 profiles of myeloid hemocytes containing all developmental stages of myeloid  
541 cells. Our scRNA-seq datasets faithfully display single-cell transcriptomes of all  
542 known cell types as well as two novel cell types: GST-rich and adipohemocytes.  
543 GST-rich cells, enriched with ROS-responsive and DNA damage genes, emerge  
544 during prohemocyte development. Considering that genes enriched in GST-rich  
545 cells are also evident in the lymph gland bulk RNA-seq, this novel population is  
546 not a consequence of stressed hemocytes. Rather, this subtype may represent a  
547 state that prohemocytes experience during development, or may play an active



548 role in ROS- or GABA-mediated stress responses (Madhwal et al., 2019; Owusu-  
549 Ansah and Banerjee, 2009; Shim et al., 2013). Adipohemocytes, on the other  
550 hand, share hallmarks of both mature plasmatocytes and lipid metabolism,  
551 appearing only at 120 h AEL of the lymph gland. Macrophages in vertebrates  
552 readily take up lipids and lipoproteins, and accumulation of lipid-containing  
553 macrophages, called foam cells, is highlighted in various pathological conditions  
554 (Li and Glass, 2002; Moore et al., 2013). In *Drosophila*, the presence of lipid-  
555 containing hemocytes has not been reported. Given our analyses, and that  
556 adipohemocytes are frequently observed in insects, including *Aedes aegypti*  
557 (Hillyer et al., 2003), it is possible that flies also conserve metabolism-oriented  
558 hemocytes to coordinate immunity and metabolism.

559

#### 560 **Prohemocytes are comprised of heterogeneous cell types and states**

561 Prohemocytes have been widely considered to represent a uniform cell  
562 population based on the expression of marker genes, *domeless* or *Tep4*. However,  
563 recent studies have suggested that prohemocytes may be more heterogeneous  
564 based on uneven expressions of cell cycle markers or bifurcated *col* expressions  
565 (Baldeosingh et al., 2018; Sharma et al., 2019). In support of these studies, our  
566 unbiased subclustering of primary clusters identified different status of  
567 prohemocytes. First, prohemocytes differ in the expression of cell cycle  
568 regulators, implying an asynchrony of prohemocyte development and their  
569 states. This observation also accounts for the stochastic cell cycle patterns  
570 visualized with the UAS-FUCCI system, a fluorescent-based cell cycle indicator  
571 (Sharma et al., 2019; Zielke and Edgar, 2015). Second, we observed dynamic  
572 expression patterns of immunogenic, metabolic or stress-responsive genes in PH

573 subclusters. For example, PH7 and PH10 are immunogenic while PH4, PH5, PH6,  
574 PH8, and GST-rich are metabolic or stress-responsive. These multiple states  
575 could be due to different susceptibility of prohemocytes to physiological  
576 conditions and may directly influence lineage specification. Lastly, the presence  
577 of prohemocytes with more differentiated states is also indicative of their  
578 dynamics. Although the presence of the intermediate zone has been recognized  
579 in previous studies (Krzemien et al., 2010; Owusu-Ansah and Banerjee, 2009),  
580 the biological significance of various intermediary states and the novel functions  
581 of expressed endogenous genes including *Nplp2* in these subclusters have not  
582 been explored.

583

#### 584 **PH1 is the stem-like prohemocyte in the lymph gland**

585 As the most primitive subcluster identified in this study, PH1, demarcates  
586 a group of cells that has not been annotated by previous markers such as *Tep4*,  
587 *Antp* or *col*. Discovery of the hidden cell population – PH1, will shed light on  
588 understanding the hierarchy of prohemocyte differentiation and enhance the  
589 relevance of the lymph gland as a hematopoietic model. Roles for *Notch*, *Stat92E*,  
590 or *scalloped* in the lymph gland development have been previously suggested by  
591 recent studies (Dey et al., 2016; Ferguson and Martinez-Agosto, 2017; Krzemien  
592 et al., 2007; Mondal et al., 2011). Moreover, clonal analyses have shown that cells  
593 adjacent to the PSC generate the largest population in the lymph gland  
594 (Minakhina and Steward, 2010a). These studies are consistent with our  
595 hypothesis that Notch/Delta- and JAK/STAT-positive cells nearby the PSC  
596 sustain latent capacities to produce the entire lymph gland hemocytes. We also  
597 observed that PSC is required for the expression of PH1, and thus, PSC is likely to

598 provide necessary signals for the maintenance of PH1 during normal  
599 development. Given that *col*<sup>+</sup> hemocytes, referred as PH2 in this study, are  
600 independent of the PSC (Baldeosingh et al., 2018; Benmimoun et al., 2015), it is  
601 possible that there are multiple niches for respective subtypes, such as the PSC  
602 for PH1 and the dorsal vessel for PH2/PH3, which are reminiscent of context-  
603 dependent niches found in vertebrates (Tikhonova et al., 2019). Identification of  
604 the factors underlying the maintenance and differentiation of PH1 will be  
605 important for understanding the nature of hematopoietic stem-like populations.

606

### 607 **Hemocytes conserve genetic homologies with human immune cells**

608 We attempted to uncover cellular heterogeneity of identical cell types  
609 originating from two different lineages and genetic homologies between  
610 *Drosophila* hemocytes and human immune cells. Previously, *Drosophila*  
611 hemocytes have been proposed to be most akin to macrophages of vertebrates  
612 (Franc et al., 1996; Sanchez Bosch et al., 2019); however, our analysis indicates  
613 that *Drosophila* hemocytes show characteristics of multiple human myeloid cells,  
614 including monocytes, dendritic cells, and granulocyte progenitors. Furthermore,  
615 our analysis reveals that *Drosophila* hemocytes additionally acquire signatures of  
616 lymphoid lineages upon active immunity. In light of our analyses, we propose  
617 that invertebrate myeloid cells carry hidden elements of lymphoid activity,  
618 contributing to divergence of the lymphoid lineage in vertebrates. Collectively,  
619 our comparative analysis supports genetic similarities between myeloid cells of  
620 flies and vertebrates, providing a resource to further understand the  
621 invertebrate and vertebrate myeloid cells.

622

623 **Acknowledgements**

624 The authors thank Dr. Greg S. Suh and all members of the Shim and the BIG labs  
625 for helpful discussions. The authors acknowledge the Bloomington, VDRC, DGRC,  
626 NIG and KDRC *Drosophila* stock centers and the DSHB hybridoma bank. The  
627 authors thank the following individuals for stocks and reagents: Drs. C. Evans, U.  
628 Banerjee, S. Sinenko, M. Zeidler, M. Crozatier, K. Brueckner, Nambu JR, A. Brand,  
629 and F. Schweisguth. This work was supported by the Samsung Science and  
630 Technology Foundation under Project Number SSTF-BA1701-15 to J.S. and by  
631 the National Research Foundation (NRF) funded by the Ministry of Science and  
632 ICT under Project Numbers 2017M3A9G8084539 and 2018R1A2B2003782 to  
633 J.N., and 2016R1A5A2008630 to S.J.M. N.P. is an Investigator of the Howard  
634 Hughes Medical Institute.

635

636 **Author Contributions**

637 B.C., S.G.T., D.L., F.K., N.C., M.S., H.D., and S.Y.O. performed experiments; B.C., S.Y.,  
638 S.G.T., Y.H., J.N., and J.S. analyzed data; S.Y.O. and S.J.M. provided technical  
639 support for Drop-seq; B.C., S.Y., F.K., S.G.T., N.P., J.N., and J.S. contributed to  
640 writing the manuscript; N.P., J.N., and J.S. supervised the project; J.N., and J.S.  
641 conceived the idea.

642

643 **Declaration of Interest**

644 The authors declare no competing interests.

645 **Figure Legends**

646 **Figure 1. Major cell types identified in developing *Drosophila* lymph glands**

647 (A) *Drosophila* lymph glands (blue, DAPI) at three timepoints (72, 96, and 120 h  
648 AEL; After Egg Laying) (left). Schematic workflow of sample preparation for  
649 scRNA-seq using Drop-seq (right). Scale bar, 30  $\mu$ m. Lymph glands are  
650 demarcated by white dotted lines.

651 (B) DAPI-positive cell counts of a single lymph gland lobe ( $n = 30$  each for three  
652 time points). Red horizontal lines show median counts (397, 1392, and 4557 for  
653 72, 96, and 120 h AEL, respectively).

654 (C) A *t*-SNE plot showing the two-dimensional projection of eight major cell  
655 types identified in the scRNA-seq dataset ( $n = 22,645$ ). The count of each cell  
656 type is indicated in parentheses. Colors denote cell types. Dotted lines demarcate  
657 prohemocytes (blue) and plasmatocytes (red).

658 (D) Two-dimensional projections of major cell types along developmental time  
659 points (left) and proportion of the cell types at each time point (right).  
660 Proportions of prohemocytes (blue) and plasmatocytes (red) are indicated.

661 (E) Relative proportion (indicated as proportional ratio; top) and normalized cell  
662 counts (bottom) of each major cell type. Colors represent sampling time points.

663

664 **Figure 2. Heterogeneous cellular states of hemocytes in the lymph gland**  
665 **defined by subclustering analysis**

666 (A) Subclusters of hemocytes—prohemocytes, plasmatocytes, lamellocyte, and  
667 crystal cells—are projected onto two-dimensional *t*-SNE plots. Non-  
668 hematopoietic cell types (Neurons; RG, ring gland) are indicated. The numbers in  
669 the plots represent the subcluster number.

670 (B) Dot plot presentation of significant gene sets in the 31 subclusters. 5  
671 representative markers, *srp*, *Tep4*, *Ance*, *Hml*, and *Pxn* are indicated to the left  
672 column. Cell-cycle regulating genes are shown in the middle. Signature genes  
673 identified in this study are marked with subcluster markers. Dot color shows  
674 levels of average expression, and dot size represents the percentage of cells  
675 expressing the corresponding marker genes in each subcluster.

676 (C) *Ama* (magenta; *Ama-Gal4 UAS-Red stinger*), *crq* (magenta; *crq-Gal4 UAS-Red*  
677 *stinger*) or *Lsd-2* (magenta; *Lsd2-Gal4 UAS-Red stinger*) partially overlap with  
678 *NimC1* (white). *Ama<sup>+</sup>NimC1<sup>+</sup>*, *crq<sup>+</sup>NimC1<sup>+</sup>* and *Lsd-2<sup>+</sup>NimC1<sup>+</sup>* cells correspond to  
679 plasmatocytes, whereas *Ama<sup>+</sup>NimC1<sup>-</sup>*, *crq<sup>+</sup>NimC1<sup>-</sup>* and *Lsd-2<sup>+</sup>NimC1<sup>-</sup>* cells  
680 represent putative adipohemocytes. Generally, *Ama<sup>+</sup>NimC1<sup>-</sup>*, *crq<sup>+</sup>NimC1<sup>-</sup>* and *Lsd-*  
681 *2<sup>+</sup>NimC1<sup>-</sup>* cells show higher *Ama*, *crq*, or *Lsd-2* expression levels than those of  
682 double-positive cells. Magnified images show colocalization of *Ama*, *crq* or *Lsd2*  
683 with *NimC1* (right in each panel). White scale bar indicates 30  $\mu$ m; yellow scale  
684 bar, 3  $\mu$ m. White dotted line demarcates the lymph gland.

685

686 **Figure 3. Reconstruction of lymph gland hematopoiesis using pseudotime**  
687 **trajectory analysis**

688 (A) A three-dimensional landscape of the lymph gland hematopoiesis trajectory  
689 using Monocle 3 ( $n = 19,143$ ). Non-hematopoietic cells were excluded in this  
690 analysis. Black line indicates the trajectory. Colors indicate the six major cell  
691 types used for analysis. The inset shows the three ancestral PH subclusters, PH1,  
692 PH2, and PH3.

693 (B) Trajectories re-drawn by developmental time points (top) and calculated  
694 pseudotime (bottom). Colors indicate the three real-time points (top) and  
695 pseudotime (bottom).

696 (C) Relative densities of hemocytes segregated by three time points (top) and  
697 cell types (bottom) along pseudotime. PH1 and PH2 are separated from other PH  
698 subclusters for higher resolution. Colors in density plots correspond to  
699 pseudotime, as in B.

700 (D) Heatmap representation of the 35 signature genes identified in PH1, PH2,  
701 and the PSC ( $n = 77, 79, \text{ and } 189$  cells, respectively). The colored legend denotes  
702 the standardized level of the genes.

703 (E) Four subgroups in PH1 and PH2 defined by the expression of *Delta* (*DI*) and  
704 *Notch* (*N*). Colors show subgroups and shapes specify PH subclusters. X axis  
705 means *N* expression; Y axis, *DI* expression.

706 (F) Binary heatmap showing the activity of transcription factors in PH1, PH2, and  
707 the PSC predicted by SCENIC. Numbers in parentheses denote the count of  
708 downstream genes used to test the activity of transcription factors.

709

710 **Figure 4. Expression of PH1 in the lymph gland**

711 (A) *STAT92E*<sup>+</sup> (green) and *TepIV*<sup>+</sup> (magenta) or *Antp*<sup>+</sup> (white) cells are mutually  
712 exclusive (*TepIV-Gal4 UAS-mCherry; STAT92E::edGFP*). The dotted box indicates  
713 the region magnified. High magnification of *STAT92E*<sup>+</sup> and *TepIV*<sup>+</sup> cells near *Antp*<sup>+</sup>  
714 PSC.

715 (B) *STAT92E*<sup>+</sup> cells (green) do not co-localize with cells expressing high (PSC) or  
716 low (PHs) levels of *collier* (magenta). Box indicates magnified view. High  
717 magnification of *STAT92E*<sup>+</sup> and *col*<sup>+</sup> cells near the PSC.

718 (C) The number of *STAT92E*<sup>+</sup> cells (green) increases during lymph gland  
719 development (72, 96, and 120 h AEL). Exclusive expression of *Antp*<sup>+</sup> (magenta)  
720 and *STAT92E*<sup>+</sup> (green) is maintained at all time points. Graphs represent  
721 quantitation of the number (left) or the proportion (right) of *STAT92E*<sup>+</sup> cells in  
722 one lymph gland lobe.

723 (D) Genetic ablation of the PSC (*pCol85-Gal4; STAT92E::edGFP UAS-hid, rpr*)  
724 attenuates *STAT92E* (green) expression in the lymph gland (left). Graph indicates  
725 quantitations of the number of *STAT92E*<sup>+</sup> cells in one lymph gland lobe (right,  
726 \*\*\**P*<0.0001).

727 (E) *Dl*<sup>+</sup> cells (magenta) are localized adjacent to the PSC (*Antp*, green). Box  
728 indicates the magnified area. Magnified views of *Dl*<sup>+</sup> (magenta) and *Antp*<sup>+</sup> (green)  
729 cells (two markers, right top; one marker, right bottom). Cyan dotted lines  
730 delineate *Dl*<sup>+</sup> expressing cells.

731 (F) *Dl*<sup>+</sup> cells (magenta) co-localize with *STAT92E*<sup>+</sup> (green). Box indicates the  
732 magnified area. Magnified view of *Dl*<sup>+</sup> (magenta) and *STAT92E*<sup>+</sup> (green) cells



733 (right). A few  $Dl^+$  cells that do not express *STAT92E::edGFP* are indicated  
734 (arrowhead).

735 (G) Lineage tracing of  $Dl^+$  cells (green, traced; magenta, real time; blue, *Antp*).  
736 *Delta-Gal4 UAS-GTRACE* covers the entire lymph gland. Box indicates the  
737 magnified view. Arrowheads represent  $Dl^+$  cells next to the *Antp^+ Dl^+* PSC. The  
738 PSC does not give rise to lymph gland hemocytes (see Supplementary Figure  
739 3A).

740 (H) Model. PH1 cells are adjacent to the PSC. PH1 and PSC or PH2 are mutually  
741 exclusive. There are multiple states of prohemocytes including GST-rich and  
742 intermediary PHs/PMs. Plasmatocytes represent an heterogenous cell  
743 population including adipohemocytes. Lamellocytes are rarely observed under  
744 normal conditions. Crystal cells are found among differentiated plasmatocytes.  
745 In panels A through G, white scale bar indicates 30  $\mu\text{m}$ ; yellow scale bar, 3  $\mu\text{m}$ .  
746 White dotted line demarcates the lymph gland. Median value is represented in  
747 graphs (C, D).

748

749 **Figure 5. Lymph gland hematopoiesis following wasp infestation**

750 (A) UMAP projections of major cell types defined in normal (top, prefix with 'n')  
751 and wasp infested (bottom, prefix with 'i') lymph glands at 96 h AEL (thus, 24 h  
752 post infestation (PI)). Non-hematopoietic cell types are excluded. Different colors  
753 indicate each cell type.

754 (B) Relative proportion (top, proportional ratio) or normalized cell counts  
755 (bottom) of major cell types in normal (blue) and wasp infested (red) lymph  
756 glands.

757 (C) Wasp infestation reduces *STAT92E*<sup>+</sup> (left) or *Dl*<sup>+</sup> (right) PH1 populations.  
758 *STAT92E* (green) or *Dl* (magenta) are expressed near the PSC of the lymph gland  
759 (top). The expression is attenuated upon immune challenges (middle). Graphs  
760 represent quantitation of the number of *STAT92E*<sup>+</sup> cells (bottom, left) or the  
761 proportion of *Dl*<sup>+</sup> (bottom, right) cells in one lymph gland lobe after infestation  
762 (24 h PI). Median value is shown in graphs (bottom, \*\*\*p<0.0001).

763 (D) A three-dimensional trajectory landscape of major cell types under wasp  
764 infestation (left), and additional representation of trajectory over calculated  
765 pseudotime using Monocle 3 (right). Box indicates the cells used for  
766 subtrajectory analysis in (E). Colors in legends show pseudotime (right).

767 (E) Subtrajectory analysis of five subclusters—iPH8, iPM1, iPM6, iLM1, and  
768 iLM2—detected in the trajectory to iLM (left). Two different waves, arrow 1/2  
769 (iPH8/iPM1, thus, intermediate cells) and arrow 3 (iPM6), advance towards iLM  
770 with distinct gene modules (right). Shared gene modules between iPH or iPM  
771 with iLM are indicated in boxes. Colored expression represents the z-  
772 transformed enrichment level of gene modules.

773 (F) Lamellocytes differentiate from intermediate iPHs (*Nplp2-Gal4 UAS-GTRACE*)  
774 or iPMs (*Hml-Gal4 UAS-GTRACE*) upon wasp infestation. *Nplp2*<sup>+</sup> iPHs (green,  
775 traced; blue, DAPI; top) or *Hml*<sup>+</sup> iPMs (green, traced; blue, DAPI; bottom) express  
776 L1 (magenta) upon wasp infestation. Insets indicate magnified images of L1<sup>+</sup>  
777 cells. Cyan dotted lines within insets demarcate traced iLMs.

778 Lymph glands are demarcated by white dotted lines. White scale bar is 30  $\mu\text{m}$ ;  
779 yellow scale bar is 3  $\mu\text{m}$ .

780

781 **Figure 6. Transcriptome-wide comparisons between embryonic and**  
782 **definitive hemocytes in *Drosophila***

783 (A) Two-dimensional projections of hemocytes in the lymph gland (top) and  
784 circulation (bottom) at 96 and 120 h AEL.

785 (B) Combined projection (top) and proportions of major cell types (bottom) in  
786 the lymph gland (yellow) and in circulation (cyan). Inset (top) shows the ratio of  
787 major cell types between the lymph gland (L) and in circulation (C).

788 (C) Dot plot of marker genes highly enriched in a lineage-specific or cell type-  
789 specific manner. The colors show the origin of the datasets (yellow, lymph gland;  
790 cyan, circulation).

791

792 **Figure 7. Transcriptome-wide comparisons of *Drosophila* hemocytes and**  
793 **human immune cells.**

794 (A) Expression of known markers for human hematopoietic cells in the bone  
795 marrow. The colored bar indicates the level of scaled gene expression. CD34  
796 indicates hematopoietic stem cell; HBA1, erythrocyte; CD79A, B cell; CD3D, naïve  
797 T cell; CD8A, CD8 T cell; NKG7, NK cell; LYZ, granulocyte progenitor; CD14,  
798 CD14<sup>+</sup> monocyte; and FCGR3A, CD16<sup>+</sup> monocyte.

799 (B) Annotations of 19 human hematopoietic cell clusters of 262,638 cells  
800 provided by the Human Cell Atlas project.

801 (C) Gene set variance analysis (GSVA) of *Drosophila* lymph gland hemocyte and  
802 human hematopoietic cell clusters. The colored bar indicates the Gene set  
803 variance analysis (GSVA) score.

804 (D) GSVA of hemocytes with human hematopoietic cells from normal (red) and  
805 24 h post wasp infestation (blue) lymph glands at 96 h AEL. The colored bar  
806 indicates the GSVA score.

807 **Material and method**

808 ***Drosophila* stocks and genetics**

809 The following *Drosophila* stocks were used in this study: *Dome<sup>Meso</sup>-EBFP2*  
810 (U.Banerjee), *HmlA-Gal4* (S.Sinenko), *Dome<sup>Meso</sup>-Gal4* (M.Zeidler), *TepIV-Gal4* (NIG,  
811 Japan), *Nplp2-Gal4* (KDRC, South Korea), *pCol85-Gal4* (M.Crozatier), *Delta-Gal4*  
812 (Bloomington), *Antp-Gal4* (U.Banerjee), *Stat92E::edGFP* (N.Perrimon), *Hml-DsRed*  
813 (K.Brueckner), *vir-1<sup>MiMiC</sup>* (Bloomington), *Ance<sup>MiMiC</sup>* (Bloomington), *UAS-hid*, *rpr*  
814 (Nambu JR), *UAS-GTRACE* (C.Evans), *nSyb-Gal4* (Bloomington), *Ama-Gal4* (NIG),  
815 *crq-Gal4* (Bloomington), *Lsd2-Gal4* (NIG), *Ilp6-Gal4* (A.Brand), *Tau<sup>MiMiC</sup>*  
816 (Bloomington), *mthl7-Gal4* (generated in this study), *Chrb<sup>MiMiC</sup>* (Bloomington),  
817 *Men-Gal4* (NIG, 113708), *NUMB::GFP* (F.Schweisguth), *zfh1-Gal4* (Bloomington),  
818 *Tep2<sup>MiMiC</sup>*(Bloomington), *UAS-EGFP* (Bloomington), *UAS-mCD8GFP*  
819 (Bloomington), *Ubx RNAi(v37823)*, *lz-gal4<sup>DBD</sup>* ; *Pxn-Gal4<sup>AD</sup>* (generated in this  
820 study)

821 Fly stocks used in this study were maintained at 25 °C. *Oregon R* was  
822 used for the scRNA-seq as a wild type. Unless indicated, crossed flies were  
823 maintained at 25 °C with dextrose-cornmeal based normal food.

824 To synchronize larval stages, one hundred adult flies were kept on grape-  
825 juice agar plate for two hours. Hatched larvae were discarded at 23 hours after  
826 egg laying (AEL), and those at 24 hours AEL were collected and reared on normal  
827 corn-meal yeast media. To screen the Gal4 lines in this study, we crossed each  
828 Gal4 strain with *UAS-GTRACE* and identified those expressed in the lymph gland.  
829 To avoid stress conditions generated by crowding, we reared less than 50 larvae  
830 in one vial.

831

### 832 **Generation of fly stocks**

833 To generate Gal4 fly lines, fly genomic DNA was amplified by primers  
834 indicated in Supplementary table 3. Amplified genomic regions were ligated into  
835 *pAGal4+*(KDRC) or TOPO-TA vector (Invitrogen; K250020) for Gateway cloning.  
836 *pBPnlsLexAp65Uw* (Addgene 26230), *pBPZpGAL4DBDUw* (Addgene; 26233) or  
837 *pBPp65ADZpUw* (Addgene; 26234) was used as destination vector. Transgenic  
838 flies were generated by KDRC, South Korea.

839

### 840 **Dissociation of lymph glands into single cells**

841 100 to 150 lymph glands were dissected at 72, 96, or 120 h AEL  
842 respectively, in Schneider's medium (Gibco, 21720024). Dorsal vessel, ring gland  
843 and posterior lobes were detached from the primary lobe of the lymph gland;  
844 only the primary lobes of the lymph glands were used in this study. Primary  
845 lobes were kept in 200  $\mu$ l ice-cooled Schneider's medium during dissection.  
846 After, centrifugation at 3,000 rpm and 4 °C for 5 minutes was done. Supernatant  
847 was discarded and 300  $\mu$ l of room temperature Schneider's medium was added  
848 to the lymph gland primary lobes. 300  $\mu$ l of Papain (Worthington, LK003178)  
849 pre-heated to 37 °C, and 4.1  $\mu$ l of Liberase TM (Roche, 5401119001) were added  
850 and gently mixed. Samples were incubated for 20 minutes with gentle agitation.  
851 At 5-, 10-, and 15-minute time points of incubation, samples were mixed using  
852 200 $\mu$ l pipette. Enzymes were inactivated with 100  $\mu$ l of ice-cooled Schneider's  
853 medium, and samples were kept on ice. Suspended cells were passed through a  
854 40  $\mu$ m cell strainer (Corning, 352340). Afterwards, centrifugation at 3,000 rpm  
855 and 4 °C for 5 minutes was done. The supernatant was discarded, and 1X filtered

856 sterile PBS was added to cells. The final concentration of cells was fixed to 300  
857 cells/ $\mu\text{l}$  for a total of 600  $\mu\text{l}$ .

858

### 859 **Drop-seq and scRNA-seq**

860 All the Drop-seq and cDNA synthesis methods followed a previous study  
861 (Macosko et al., 2015). The concentration of beads was fixed to 300 beads/ $\mu\text{l}$ .  
862 Around 10 minutes Drop-seq run was performed for each experiment. After  
863 cDNA synthesis, scRNA-seq was performed using Illumina NextSeq.

864

### 865 **Preprocessing and mapping of scRNA-seq data**

866 Raw scRNA-seq data were generated in paired-end reads following  
867 single-cell capture using Drop-seq: one end included a barcode and unique  
868 molecular identifier (UMI) sequences in 20 nucleotides (12 and 8 nts,  
869 respectively), and the other end, cDNA in 50 nts. The preprocessing and mapping  
870 of scRNA-seq data produced in this study followed the Drop-seq Core  
871 Computational Protocol version 1.2 (January 2016) and corresponding Drop-seq  
872 tools version 1.13 (December 2017) provided by the McCarroll Lab  
873 (<http://mccarrolllab.org/dropseq/>).

874 First, the reference genome (Fasta, BDGP 6.02) and transcriptome  
875 annotations (gtf, September 2014) required for the processing were downloaded  
876 from the Ensembl website (<http://asia.ensembl.org/>). Additional dictionary and  
877 refFlat files were generated using *picard* (*CreateSequenceDictionary*) and  
878 *ConvertToRefFlat* provided in the Drop-seq tools package, respectively. These

879 reference data were prepared with the same prefix and stored in a single  
880 directory for later use. Simplified command lines are as follows:

881 **Generation of a dictionary file:**

```
882     java -jar <path to Drop-seq tools picard>/picard.jar  
883     CreateSequenceDictionary R=<genome fasta> O=<output dictionary>
```

884 **Generation of a refFlat file:**

```
885     <path to Drop-seq tools>/ConvertToRefFlat \  
886     ANNOTATIONS_FILE=<gft annotation> \  
887     SEQUENCE_DICTIONARY=<dictionary file> O=<output refFlat>
```

888

889 **Once all the reference data was prepared, paired-end fastq files were**  
890 **converted to the bam format using *picard FastqToSam*.**

```
891     java -jar <path to Drop-seq tools picard>/picard.jar FastqToSam \  
892     F1=<fastq 1> F2=<fastq 2> O=<output bam> SM=<library number>  
893
```

894 **The unaligned bam files were subjected to the *Drop-seq\_alignment.sh***  
895 **script for alignment to genome. This shell script is a single pipeline that executes**  
896 **detection of barcode and UMI sequences, filtration and trimming of low-quality**  
897 **bases and adaptors or poly-A tails, and alignment of reads using *STAR* (2.5.3a).**

```
898     <path to Drop-seq tools>/Drop-seq_alignment.sh \  
899     -g <path to STAR index> -r <genome fasta> -n <# of cells expected> \  
900     -d <path to Drop-seq tools> -s <path to STAR> \  
901     -o <path to output> -t <path to temporary output> -p <unaligned bam  
902     file>
```

903

#### 904 **Selection of cells by the total mapped reads**

905 **To extract the number of cells having proper read counts, the aligned**  
906 **bam files generated from the previous section were summarized using**



907 *BAMTagHistogram* in the Drop-seq tools package. This program extracts the  
908 number of aligned reads per cell barcode which is subsequently used to plot the  
909 cumulative distribution of reads.

```
910 <path to Drop-seq tools>/BAMTagHistogram I=<aligned bam> O=<output file>  
911 TAG=XC
```

912

913 Cumulative read distribution plots were then explored, and the number of  
914 cells were inferred where a sharp decrease (referred as ‘knee’ by the author’s  
915 documentation) in a slope occurs. The inferred cell number was determined as a  
916 minimal threshold number of aligned reads per cell for cell selection. To  
917 summarize, a minimum of 30,000 reads per cell for 72 h AEL library 6, 15,000  
918 per cell for 72 h AEL library 3, 10,000 per cell for 72 h AEL libraries 1, 2, and 4;  
919 5000 per cell for 96 h AEL libraries 1, 3, 5, all 120 h AEL libraries, and infested 96  
920 h AEL libraries 1, 2, and 4; 4000 per cell for infested 96 h AEL 2, 3000 per cell for  
921 96 h AEL library 4 and infested 96 h AEL library 3; 2000 per cell for 92 h AEL  
922 library 2 were chosen as thresholds. *DigitalExpression* provides UMI count  
923 matrix (selected cells by genes) using a mapped bam file and the minimum  
924 number of reads per cell as following.

```
925 <path to Drop-seq tools>/DigitalExpression \  
926 I=<aligned bam> MIN_NUM_READS_PER_CELL=<read count threshold> \  
927 O=<output read count matrix> SUMMARY=<output summary>  
928
```

929 The resulting output per library is written into a file with a name where a  
930 corresponding library number was added as a suffix to each barcode sequence  
931 with an AEL timepoint (*e.g.* barcode-72-1 or barcode-96-2) to avoid collision of  
932 barcode sequences between libraries. The number of expressed genes between  
933 libraries or sampling timepoints may vary because each library would have a

934 different number of captured cells, different cell types, or uneven sequencing  
935 depth. In total, at least 13,612, 13,523, 14,277, and 13,658 genes, and 2505,  
936 10,027, 11,702, and 10,939 cells were detected in one library at 72, 96, 120, or  
937 infested 96 h AEL respectively. So, we used a union set of genes (15,540 genes)  
938 to merge three normal lymph gland datasets.

939

### 940 **scRNA-seq data analysis using Seurat 3.0**

941 Seurat is a universal software for scRNA-seq analyses including  
942 preprocessing, cell clustering, and dimension reductions. The current version  
943 (v3.0) of Seurat features dimension reduction using uniform manifold  
944 approximation and projection (UMAP), integration of datasets produced with  
945 different modalities or conditions, and transfer of cell labels between datasets  
946 (Butler et al., 2018; Stuart et al., 2019). Detailed analyses steps are explained on  
947 the Seurat website (<https://satijalab.org/seurat/>), so we only describe the  
948 schematic workflow used in this study.

949 First, each library was filtered for low-quality cells, separately, by setting  
950 thresholds for UMI and gene counts. We used 5,000 genes as an upper threshold  
951 and 400 genes as a lower threshold for normal lymph gland libraries and  
952 infested lymph gland library 1 and 2, and 200 genes as a lower threshold for  
953 other infested lymph gland libraries. Then we also filtered cells having UMI  
954 counts higher than two standard deviations from the mean UMI count to exclude  
955 multiplets. After filtration, 2399, 9496, 11,081, and 10,461 cells remained for 72,  
956 96, 120, and infested 96 h AEL, respectively. All libraries in each sampling  
957 timepoint (h AEL) were then merged and normalized, and cells expressing

958 mitochondrial genes higher than 10% of total UMI count were removed (2322,  
959 9411, 10,976, and 10,179 cells remained). After high mitochondrial cells were  
960 excluded, multiplets were inferred using Scrublet (Wolock et al., 2019), which  
961 simulates artificial doublets using given expression matrix to predict multiplet  
962 artifacts. One, 11, and 52 cells were further filtered out from 72, 96, and 120 h  
963 AEL lymph glands. However, no cells were detected from the infested dataset. As  
964 a result, 2321 (72 h AEL), 9400 (96 h AEL), 10,924 (120 h AEL), and 10,179 cells  
965 (infested 96 h AEL) were subjected to downstream analyses.

966         Next, for the integration of cells from normal lymph glands at three  
967 timepoints (normal lymph gland integration), cells were aligned using  
968 *FindIntegrationAnchors()* and *IntegrateData()* with default parameters,  
969 respectively. UMI counts were normalized, log-transformed, and scaled to  
970 properly integrate datasets, and 52 principle components (PCs) were used to  
971 explain the variability of the scaled UMI counts across cells. t-SNE and UMAP  
972 plots were then manually curated with random seeds using the selected PCs.  
973 Clustering was performed with resolution of 0.8 to get 19 clusters. Then again,  
974 clusters were aggregated to get broad cell types based on expression of known  
975 marker genes (Figure S1G). In summary, six and seven clusters were merged as  
976 collective PH and PM, respectively, to define the following six major cell types:  
977 PSC, LM, CC, DV, GST-rich, and adipohemocyte.

978         When the integrated normal lymph gland dataset was examined, we  
979 found that subclusters of PH and PM cells solely originated from 120 h AEL  
980 (Figure 1D and Figure S1I). Thus, we analyzed our dataset using a different batch  
981 normalization method to test whether this trend is independent of our analysis

982 strategy. For this, we corrected the sequencing library variable using *ScaleData*  
983 function along with the UMI count. We then selected the number of PCs to use  
984 (50 PCs) and performed t-SNE and UMAP analyses again. Similarly, a number of  
985 cells from 120 h AEL were separated from others while cell types, such as PSC,  
986 LM, or CC were mixed together (Figure S1J). An R package, *rgl*, was used for all 3-  
987 dimensional plots presented in this study.

988

### 989 **Pseudo-bulk RNA-seq trajectory analysis**

990 Normal lymph gland scRNA-seq libraries were examined to see whether  
991 they could be aligned in a single trajectory line as actual development timepoints.  
992 As we produced at least four sequencing libraries for each timepoint from  
993 independent sample preparations and sequencing, we performed trajectory  
994 analysis in pseudo-bulk RNA-seq samples, pooling all cells from each library. For  
995 this, valid cell barcodes identified in the previous analysis were collected and  
996 their UMI count matrices were retrieved. All UMI count values were then  
997 aggregated by genes to generate pseudo-bulk RNA-seq data. We applied Monocle  
998 2 (Qiu et al., 2017; Trapnell et al., 2014) for this trajectory analysis using 2758  
999 highly variable genes or top 500 most differentially expressed (DE) genes out of  
1000 7596 genes (expressing more than one UMI in at least three cells) with default  
1001 parameters. The highly variable genes were selected with criteria of  
1002  $dispersion\_empirical \geq 1 * dispersion\_fit \& mean\_expression \geq 1$ . In both analyses,  
1003 the results were similar, so the trajectory using variable genes was presented  
1004 (Figure S1E).

1005

## 1006 **Subclustering analysis**

1007           To determine detailed cellular states or subtypes and to exclude  
1008 unintended cells that originate from only a single library, each of eight major cell  
1009 types was clustered separately using Seurat. For this, 1) cells designated to each  
1010 cell type were retrieved from the integrated Seurat object, 2) their UMI counts  
1011 were scaled and normalized for sequencing library and total UMI counts, and 3)  
1012 the number of PCs were determined for dimension reduction and clustering  
1013 analysis. In each subclustering analysis, hundreds of t-SNE and UMAP plots were  
1014 manually examined with random seeds for visualization. Resolution for  
1015 clustering analysis was manually selected as follows: 13 subclusters for PH (*res* =  
1016 0.8), 14 for PM (*res* = 0.9), two for LM (*res* = 0.3), three for CC (*res* = 0.1), and  
1017 another three for adipohemocytes (*res* = 0.3) were detected. Other cell types  
1018 (PSC, GST-rich, and DV) were not further clustered. Next, subclusters mainly  
1019 originating from a single library (more than half) were removed from the  
1020 datasets because they may have resulted from experimental artefacts. In fact,  
1021 two, three, one, and two subclusters were excluded from PH, PM, CC, and  
1022 adipohemocyte, correspondingly (Figure S2B).

1023           When the results were examined using known marker genes, one PM  
1024 subcluster (PM11) that displayed a high level of ring gland marker gene, *phm*,  
1025 was excluded from subsequent analyses. Particularly, of 11 remaining PH  
1026 subclusters, one PH subcluster (PH1) displayed a high level of genes related to  
1027 the Notch signaling pathway, which is known to be important for prohemocyte  
1028 maintenance and differentiation. The PH1 subcluster forms a small group of cells  
1029 separated from the main PH cluster in the first clustering analysis, which seems

1030 to be more related to the PH2 subcluster displaying distinct molecular signatures  
1031 (Figure 2B). We thus sought to investigate these subclusters in more detail, along  
1032 with PSC cells which are known to maintain early prohemocytes in lymph glands.  
1033 For this, we reclustered PH1, PH2, and PSC cells together, and found 6  
1034 subclusters. However, one of these subclusters appeared to be neuronal cells as  
1035 they expressed specific neuronal markers, such as *nSyb* or *Syt1* (Figure S2D). On  
1036 the other hand, three PSC subclusters were detected but merged because they all  
1037 shared the same signature genes (Figure 3D). In addition, 13 PH cells—  
1038 annotated as PSC and 3 PSC cells—that comingled with PH1 or 2 in the  
1039 subclustering analysis were removed, as their identities were inconsistent. In  
1040 summary, we defined a total of 31 subclusters from the normal lymph gland  
1041 dataset (Figure 2); 11 for PH, 10 for PM, two each for LM and CC, one each for  
1042 PSC, GST-rich, and adipohemocyte, and three non-hematopoietic cell types (DV,  
1043 RG, and Neurons).

1044

### 1045 **Trajectory analysis using Monocle 3**

1046 To reconstruct lymph gland hematopoiesis in *Drosophila*, hematopoietic  
1047 cells in the blood lineage were collected after filtering the PSC, DV, RG, and  
1048 neuron subclusters. We then followed the Monocle 3 (Cao et al., 2019) analysis  
1049 pipeline described in the website documentation ([https://cole-trapnell-](https://cole-trapnell-lab.github.io/monocle3/)  
1050 [lab.github.io/monocle3/](https://cole-trapnell-lab.github.io/monocle3/)) using custom parameters predetermined from  
1051 repetitive analyses. We normalized the dataset by log-transformation and size  
1052 factor correction, following three covariates, sequencing library, UMI count, and  
1053 mitochondrial gene contents (the proportion of mitochondrial genes in

1054 transcriptome), and scaled using the *preprocess\_cds()* function with 75 PCs.  
1055 UMAP dimension reduction (*reduce\_dimension*) was performed with custom  
1056 parameters *umap.min\_dist* = 0.4 and *max\_components* = 3, and clustering  
1057 resolution (*cluster\_cells*) was set to 0.001 which assigned all cells into a single  
1058 partition. After graph learning was performed (*learn\_graph*), the cells were  
1059 ordered using *order\_cells()* to set a node embedded in the PH1 subcluster as a  
1060 start point. All the trajectory graphs were visualized using the *plot\_cells()*  
1061 function with or without a trajectory graph.

1062         Monocle 3 offers several approaches for differential expression analyses  
1063 using regression or graph-autocorrelation. In this study, we identified co-  
1064 regulated genes along the pseudotime by graph-autocorrelation and  
1065 modularized them. To detect co-regulated genes, the graph-autocorrelation  
1066 function *graph\_test()* was specified with a “principal\_graph” parameter and  
1067 significant genes were selected (*q* value < 0.05). Modularization was performed  
1068 using *find\_gene\_modules()* with default parameters but only passing a list of  
1069 resolution values from  $10^{-6}$  to 0.1 for automatic parameter selection. A total of 51  
1070 gene modules were detected from the normal lymph gland trajectory, however,  
1071 three modules were excluded in that they were unable to be characterized by the  
1072 enrichment analysis with biological process gene ontology terms or KEGG  
1073 pathways using g:Profiler (<https://biit.cs.ut.ee/gprofiler/gost>).

1074         The trajectory analysis of infested lymph gland (Figure 5D) followed a  
1075 similar pipeline as that of normal lymph gland with slightly different parameters.  
1076 The dataset was normalized and corrected for covariates, sequencing library,  
1077 UMI count, and mitochondrial gene contents in the same manner, though using

1078 50 PCs. We then used 0.5 for the minimum distance in UMAP and 0.005 for the  
1079 clustering resolution. Gene modules were also explored using a complete dataset  
1080 and the result generally agreed with the previous gene modules using normal  
1081 lymph glands. So, we focused on the LM trajectory in the analysis. First, we  
1082 filtered all the other subclusters except for PH8, PM1, and PM6 with two LM  
1083 subclusters because these subclusters were mainly found in the LM  
1084 differentiation paths. Then, we collected cells by excluding those having a UMAP  
1085 1 coordination higher than -1.5 (Figure 5E, inset). Modularization of co-regulated  
1086 genes was performed as previously described using these cells.

1087

#### 1088 **Investigation of transcription factor activity using SCENIC**

1089 To predict transcription factor regulatory networks in developing lymph  
1090 glands, we performed SCENIC (Aibar et al., 2017) analyses on the 1) normal  
1091 lymph gland dataset excluding non-hematopoietic cells ( $n = 19,332$ ) and 2) early  
1092 PH subclusters with PSC (PH1, PH2, and PSC;  $n = 77, 79, \text{ and } 189$ , respectively).  
1093 We followed the general SCENIC workflow from gene filtration to binarization of  
1094 transcription factor (TF) activity described by the authors  
1095 (<https://www.aertslab.org/#scenic>), using a provided cisTarget reference based  
1096 on *Drosophila melanogaster* release 6.02. For the latter analysis, we filtered  
1097 genes using the following two criteria: 1) genes expressed higher than a UMI  
1098 count threshold of  $3 \times (2.5\% \text{ of total cell count})$ , and 2) genes expressed in at least  
1099 2.5% of total cells (8625 cells). We retrieved 4588 genes from these steps and  
1100 performed the analysis.



1101           When we investigated the normal lymph gland dataset, however,  
1102 predictions for several well known TFs in cell types with relatively small sizes,  
1103 such as *Iz* for CC (1.44% of the input dataset) or *Antp* for PSC (0.97% of the input  
1104 dataset), were affected by the presence of other major cell types. For example, *Iz*  
1105 was an active TF of CC only when PSC, adipohemocyte and GST-rich cell types  
1106 were excluded from the analysis. We reasoned that the relative population size  
1107 may affect the predictive power, and signals of TFs active in small populations  
1108 would be frequently ignored. To tackle this issue, we randomly sampled 42 cells  
1109 (two thirds of the smallest subcluster—LM2,  $n = 63$ ) from each of 28  
1110 hematopoietic subclusters, then collected active TFs using a SCENIC workflow  
1111 with slightly different gene filtration parameters (we modified 2.5% of the total  
1112 cell count to 1.0% of total cell count in both gene filtration criteria). We  
1113 iteratively performed 100 independent trials measuring frequencies for TFs and  
1114 collected 45 out of 177 TFs predicted active at least 25 times. Then we generated  
1115 pseudo-bulk profiles for cell types in each timepoint by aggregating scaled gene  
1116 expression values retrieved from the Seurat object. During the pseudo-bulk  
1117 generation, LM, CC, GST-rich, and adipohemocyte from 72 h AEL ( $n = 2, 4, 14$ , and  
1118 1, respectively) and LM and adipohemocyte from 96 h AEL ( $n = 14$  and 5,  
1119 respectively) were filtered because the number of cells in these groups was less  
1120 than 0.1% (~19 cells) of the complete lymph gland dataset. Using pseudo-bulk  
1121 profiles, we produced a heatmap describing TF expression in cell types for each  
1122 timepoint (Figure S1K) using the R package *pheatmap*.

1123

1124   **Comparative analysis between normal and wasp infested lymph glands**

1125 For the integration of infested lymph gland (24 h PI; 96 h AEL) with  
1126 normal dataset from 96 h AEL, those datasets were aligned using Seurat 3.0.  
1127 functions, *FindTransferAnchors()* and *TransferData()* with default parameters.  
1128 Again, UMI counts were normalized, log-transformed, and scaled to properly  
1129 integrate datasets, and the number of PCs was determined (46 PCs).  
1130 Subclustering labels defined in normal 96 h AEL lymph gland were transferred to  
1131 infested lymph gland, and three minor subclusters were excluded because they  
1132 were only found in the normal dataset; PH11 ( $n = 3$ ), PM10 ( $n = 3$ ), and  
1133 adipohemocyte ( $n = 5$ ). Three non-hematopoietic cell types (35 DV, 18 neurons,  
1134 and 12 RG cells) were not considered in subsequent analysis.

1135

### 1136 **Comparative analysis between lymph gland and circulation**

1137 A UMI count matrix of 120 h AEL circulating hemocytes described in  
1138 Tattikota *et al.* was used. Given that the gene annotation version used in Sudhir  
1139 *et al.* was different from ours, an FBgn to Annotation ID conversion table was  
1140 downloaded from FlyBase (<https://flybase.org>;  
1141 `fbgn_annotation_ID_fb_2019_03.tsv`) to match gene IDs. After filtration of non-  
1142 hematopoietic cell types (DV, RG) from the lymph gland dataset and circulating  
1143 hemocytes expressing high mitochondrial genes (higher than 20%), 17,122 cells  
1144 from 96 and 120 h AEL lymph glands ( $n = 9339$  and  $7783$ , respectively) were  
1145 aligned with 3706 hemocytes from Tattikota *et al.* dataset and additional 96 and  
1146 120 h AEL circulation datasets ( $n = 1235$ ,  $977$ , and  $1494$ , respectively) using 54  
1147 PCs. Subclustering labels in lymph glands were transferred to the circulation  
1148 datasets using *FindTransferAnchors()* and *TransferData()* with default

1149 parameters. Prior to the comparison of aligned cell types, a number of  
1150 subclusters in circulation datasets were filtered because they were either 1)  
1151 subclusters mainly originated from a single library (more than half) or 2) minor  
1152 subclusters (less than 1% of total circulation cells). After filtration, seven  
1153 subclusters remained for subsequent analysis (PH1 = 67, PM4 = 355, PM5 =  
1154 1224, PM6 = 961, PM7 = 896, CC1 = 99, and CC2 = 104). To compare gene  
1155 expression between circulating and lymph gland hemocytes, each cell type or  
1156 subcluster was independently analyzed for differentially expressed genes using  
1157 Seurat. Then, gene expression values from each dataset were averaged and log-  
1158 transformed and top 10 DEGs were marked for visualization (Figure S6).

1159

#### 1160 **Annotation of HCA bone marrow cells**

1161 The preview dataset produced by HCA, Census of Immune Cells  
1162 (Rozenblatt-Rosen et al., 2017), was downloaded from the HCA data portal  
1163 (<https://preview.data.humancellatlas.org>). The dataset was produced from bone  
1164 marrow samples donated by eight individuals and sequenced using 10X  
1165 Genomics Chromium. To capture high-quality cells from the raw data, we filtered  
1166 cells that fail to meet the following criteria: 1) those expressing less than 500  
1167 genes, 2) those with UMI counts higher than two standard deviations from mean  
1168 UMI counts, 3) those expressing mitochondrial genes higher than 10% of total  
1169 gene expression. After the preprocessing step, 262,638 cells were passed to the  
1170 subsequent analysis. Cells from different donors were aligned using  
1171 *FindIntegrationAnchors()* and *IntegrateData()* with default parameters,  
1172 respectively. UMI counts were normalized, log-transformed, and scaled to  
1173 properly integrate datasets, and 61 PCs were then used for UMAP projection and

1174 clustering. Clustering was performed with resolution of 0.8 to get 34 clusters. All  
1175 the 34 clusters were annotated based on expression of known marker genes.  
1176 Clusters were then compared using Spearman correlation of gene expression  
1177 values, and similar clusters (Spearman's  $\rho \geq 0.95$ ) were aggregated to obtain  
1178 the 19 clusters shown in Figure 7A.

1179

### 1180 **Gene set variance analysis of *Drosophila* hemocyte signature genes**

1181 Orthologous genes between *Drosophila* and human were searched using  
1182 DRSC Integrative Ortholog Prediction Tool (DIOPT) version 8.0 (Hu et al., 2011)  
1183 with default settings. The gene expression of 262,638 HCA cells was aggregated  
1184 by annotated cell types to obtain a pseudo-bulk matrix, and the non-  
1185 hematopoietic stromal cell cluster was excluded. Then, 6463 conserved human  
1186 genes which met one of the following criteria were converted to those of the fly:  
1187 1) pairs of genes conserved in one-to-one manner or 2) pairs of genes scored  
1188 with the highest weighted DIOPT score when conserved in a many-to-one or  
1189 one-to-many manner.

1190 Signature genes of seven major hemocytes were analyzed by Seurat DEG  
1191 analysis using `FindAllMarkers()` with `min.pct = 0.25` and `only.pos = TRUE`  
1192 parameters and only statistically significant genes were left (adjusted  $P$ -value  $\leq$   
1193 0.05; false discovery rate). Then, these genes were searched in fly-human gene  
1194 pairs to count the number of signature genes conserved in each major cell type.  
1195 PH had the least number of conserved signature genes ( $n = 30$ ), and thus, the top  
1196 30 conserved signature genes were used for enrichment analysis in other cell  
1197 types. Gene set variance analysis (GSVA) (Hanzelmann et al., 2013) was  
1198 performed on pseudo-bulk HCA data with these customized gene sets to identify

1199 the enrichment of hemocyte signatures in human bone marrow. GSVA scores  
1200 were clustered and visualized using an R package *pheatmap* (Figure 7C).

1201

### 1202 **Bulk RNA-seq of the lymph gland**

1203         Procedures prior to the Papain treatment were performed to collect intact  
1204 lymph glands. Instead of Papain solution, TRIzol (MRC, TR118) was added to  
1205 lymph glands and RNA extraction performed. More than 1ug of RNA was  
1206 prepared for each experiment. A cDNA library was constructed by 5' and 3'  
1207 adapter ligation and loaded into a flow cell where fragments are captured into  
1208 library adapters. Each fragment was then amplified through bridge amplification.  
1209 After cluster generation was completed, templates were sequenced by Illumina  
1210 TruSeq.

1211

### 1212 **Wasp Infestation**

1213         Larvae were infested at 72 h AEL with *Leptopilina boulardi*. Wasps were  
1214 removed after 8 hours of co-culture and egg deposition was confirmed by direct  
1215 observation of wasp eggs in the hemolymph during dissection. All infestation  
1216 procedures were performed at 25 °C.

1217

### 1218 **Immunohistochemistry**

1219         Lymph glands were dissected and stained as previously described (Jung  
1220 et al., 2005). The following primary antibodies were used in this study:  $\alpha$ -Iz  
1221 (DSHB, 1:10),  $\alpha$ -Antp (DSHB, 1:10),  $\alpha$ -Dl (DSHB, 1:10),  $\alpha$ -L1 (I.Ando, 1:100),  $\alpha$ -  
1222 col (M.Crozatier, 1:400),  $\alpha$ -Ubx (DSHB, 1:10),  $\alpha$ -nc82 (DSHB, 1:10),  $\alpha$ -NimC1  
1223 (I.Ando, 1:100),  $\alpha$ -Pxn (Yoon et al., 2017),  $\alpha$ -GFP (Sigma Aldrich; G6539; 1:2000)

1224 and  $\alpha$ -F-actin (ThermoFisher; A34055, 1:200). Cy3-, FITC- or Alexa Fluor 647-  
1225 conjugated secondary antibody (Jackson Laboratory) was used for staining at a  
1226 1:250 ratio. All samples were kept in VectaShield (Vector Laboratory) and  
1227 imaged by a Nikon C2 Si-plus confocal microscope.

1228 For  $\alpha$ -Delta staining, a pre-absorption step was essential to reduce  
1229 background in the lymph gland. For the pre-absorption step, 1:10 diluted (with  
1230 2% sodium azide)  $\alpha$ -Dl antibody was incubated together with 9 fixed larval  
1231 cuticles overnight at 4°C. Lymph glands were dissected in Schneider's medium  
1232 and cultured in Schneider's medium with 10mM EDTA for 30 minutes. Samples  
1233 were incubated with 3.7% formaldehyde for 1 hour for fixation at 25 °C. After  
1234 fixation, lymph glands were washed 3 times in 0.1% Triton X-100 in 1xPBS and  
1235 blocked in 1% BSA/0.1% Triton X in 1xPBS for 1 hour. Lymph glands were  
1236 incubated overnight at 4°C with  $\alpha$ -Dl antibody. Lymph glands were washed 3  
1237 times in 0.1% Triton X in 1xPBS and then incubated with  $\alpha$ -mouse secondary  
1238 antibody with 1% BSA/0.1% Triton X in 1xPBS for 3 hours at room temperature.  
1239 After washing 3 times with 0.1% Triton X in 1xPBS, samples were mounted in  
1240 Vectashield (Vector Laboratory) with DAPI and imaged by a Nikon C2 Si-plus  
1241 confocal microscope.

1242

### 1243 **Bleeding hemocytes**

1244 Larvae were vortexed with glass beads (Sigma G9268) for one minute  
1245 before bleeding to detach sessile hemocytes (Petraki et al., 2015). Larvae were  
1246 bled on a slide glass (Immuno-Cell Int.; 61.100.17) and hemocytes allowed to  
1247 settle onto the slide at 4 °C for 40 minutes. Hemocytes were washed 3 times in

1248 0.4% Triton X-100 in 1x PBS for 10 minutes and blocked in 1% BSA/0.4%  
1249 TritonX in 1xPBS for 30 minutes. Primary antibody was added and samples  
1250 incubated overnight at 4°C. Hemocytes were washed 3 times in 0.4% Triton X in  
1251 1xPBS and then incubated with a secondary antibody with 1% BSA/0.4% Triton  
1252 X in 1xPBS for 3 hours at room temperature. After washing 3 times with 0.4%  
1253 Triton X in 1xPBS, samples were kept in Vectashield (Vector Laboratory) with  
1254 DAPI and imaged by a Nikon C2 Si-plus confocal microscope.

1255

### 1256 **Quantification of samples**

1257 Stained or fluorescent cells were quantified and analyzed by IMARIS  
1258 software (Bitplane). Individual primary lobes were counted for this study. *In vivo*  
1259 data was analyzed by the Wilcoxon rank sum test after determining normality  
1260 with the use of SPSS (version 24).

1261

### 1262 **Fluorescent *in situ* hybridization**

1263 An *in situ* hybridization protocol in a previous study (Crozatier et al.,  
1264 1996) was used. An anti-*delta* probe was designed based on *delta* cDNA  
1265 sequences (Forward primer: ATGTGCGAGGAGAAAGTGCT, Reverse primer:  
1266 CGACTTGTCCCAGGTGTTTT). DIG-labeled probes were detected by  $\alpha$ -DIG-biotin  
1267 antibody (Jackson Immunoresearch; 200-062-156) and visualization was done  
1268 using a SuperBoost™ Kit (ThermoFisher; B40933). The sense probe was used as  
1269 a negative control.

1270

### 1271 **Data and software availability**

1272            In-house R and Python codes that were implemented in this study are  
1273    available on GitHub ([https://github.com/sangho1130/Dmel\\_Dropseq](https://github.com/sangho1130/Dmel_Dropseq)). Raw  
1274    scRNA-seq and bulk RNA-seq reads are available through the NCBI Gene  
1275    Expression Omnibus (GEO) (GSE141275).



## 1276 Reference

- 1277 Aibar, S., Gonzalez-Blas, C.B., Moerman, T., Huynh-Thu, V.A., Imrichova, H.,  
1278 Hulselmans, G., Rambow, F., Marine, J.C., Geurts, P., Aerts, J., *et al.* (2017). SCENIC:  
1279 single-cell regulatory network inference and clustering. *Nat Methods* *14*, 1083-  
1280 1086.
- 1281 Anderl, I., Vesala, L., Ihalainen, T.O., Vanha-Aho, L.M., Ando, I., Ramet, M., and  
1282 Hultmark, D. (2016). Transdifferentiation and Proliferation in Two Distinct  
1283 Hemocyte Lineages in *Drosophila melanogaster* Larvae after Wasp Infection.  
1284 *PLoS Pathog* *12*, e1005746.
- 1285 Baldeosingh, R., Gao, H., Wu, X., and Fossett, N. (2018). Hedgehog signaling from  
1286 the Posterior Signaling Center maintains U-shaped expression and a  
1287 prohemocyte population in *Drosophila*. *Dev Biol* *441*, 132-145.
- 1288 Banerjee, U., Girard, J.R., Goins, L.M., and Spratford, C.M. (2019). *Drosophila* as a  
1289 Genetic Model for Hematopoiesis. *Genetics* *211*, 367-417.
- 1290 Bazzi, W., Cattenoz, P.B., Delaporte, C., Dasari, V., Sakr, R., Yuasa, Y., and  
1291 Giangrande, A. (2018). Embryonic hematopoiesis modulates the inflammatory  
1292 response and larval hematopoiesis in *Drosophila*. *Elife* *7*.
- 1293 Benmimoun, B., Polesello, C., Haenlin, M., and Waltzer, L. (2015). The EBF  
1294 transcription factor Collier directly promotes *Drosophila* blood cell progenitor  
1295 maintenance independently of the niche. *Proc Natl Acad Sci U S A* *112*, 9052-  
1296 9057.
- 1297 Binggeli, O., Neyen, C., Poidevin, M., and Lemaitre, B. (2014). Prophenoloxidase  
1298 activation is required for survival to microbial infections in *Drosophila*. *PLoS*  
1299 *Pathog* *10*, e1004067.
- 1300 Blondel, V.D., Guillaume, J.-L., Lambiotte, R., and Lefebvre, E. (2008). Fast  
1301 unfolding of communities in large networks. *Journal of Statistical Mechanics:*  
1302 *Theory and Experiment* *2008*, P10008.
- 1303 Butler, A., Hoffman, P., Smibert, P., Papalexi, E., and Satija, R. (2018). Integrating  
1304 single-cell transcriptomic data across different conditions, technologies, and  
1305 species. *Nat Biotechnol* *36*, 411-420.
- 1306 Cao, J., Spielmann, M., Qiu, X., Huang, X., Ibrahim, D.M., Hill, A.J., Zhang, F.,  
1307 Mundlos, S., Christiansen, L., Steemers, F.J., *et al.* (2019). The single-cell  
1308 transcriptional landscape of mammalian organogenesis. *Nature* *566*, 496-502.
- 1309 Cooper, E.L. (1976). Evolution of blood cells. *Ann Immunol (Paris)* *127*, 817-825.
- 1310 Crozatier, M., Ubeda, J.M., Vincent, A., and Meister, M. (2004). Cellular immune  
1311 response to parasitization in *Drosophila* requires the EBF orthologue collier.  
1312 *PLoS Biol* *2*, E196.
- 1313 Crozatier, M., Valle, D., Dubois, L., Ibnsouda, S., and Vincent, A. (1996). Collier, a  
1314 novel regulator of *Drosophila* head development, is expressed in a single mitotic  
1315 domain. *Curr Biol* *6*, 707-718.
- 1316 Crozatier, M., and Vincent, A. (2011). *Drosophila*: a model for studying genetic  
1317 and molecular aspects of haematopoiesis and associated leukaemias. *Dis Model*  
1318 *Mech* *4*, 439-445.
- 1319 Dey, N.S., Ramesh, P., Chugh, M., Mandal, S., and Mandal, L. (2016). Dpp  
1320 dependent Hematopoietic stem cells give rise to Hh dependent blood progenitors  
1321 in larval lymph gland of *Drosophila*. *Elife* *5*.

- 1322 Edgar, B.A., Lehman, D.A., and O'Farrell, P.H. (1994). Transcriptional regulation  
1323 of string (*cdc25*): a link between developmental programming and the cell cycle.  
1324 *Development* *120*, 3131-3143.
- 1325 Evans, C.J., Hartenstein, V., and Banerjee, U. (2003). Thicker than blood:  
1326 conserved mechanisms in *Drosophila* and vertebrate hematopoiesis. *Dev Cell* *5*,  
1327 673-690.
- 1328 Evans, C.J., Liu, T., and Banerjee, U. (2014). *Drosophila* hematopoiesis: Markers  
1329 and methods for molecular genetic analysis. *Methods* *68*, 242-251.
- 1330 Ferguson, G.B., and Martinez-Agosto, J.A. (2014). Yorkie and Scalloped signaling  
1331 regulates Notch-dependent lineage specification during *Drosophila*  
1332 hematopoiesis. *Curr Biol* *24*, 2665-2672.
- 1333 Ferguson, G.B., and Martinez-Agosto, J.A. (2017). The TEAD family transcription  
1334 factor Scalloped regulates blood progenitor maintenance and proliferation in  
1335 *Drosophila* through PDGF/VEGFR receptor (Pvr) signaling. *Dev Biol* *425*, 21-32.
- 1336 Franc, N.C., Dimarcq, J.L., Lagueux, M., Hoffmann, J., and Ezekowitz, R.A. (1996).  
1337 Croquemort, a novel *Drosophila* hemocyte/macrophage receptor that recognizes  
1338 apoptotic cells. *Immunity* *4*, 431-443.
- 1339 Gajewski, K.M., Sorrentino, R.P., Lee, J.H., Zhang, Q., Russell, M., and Schulz, R.A.  
1340 (2007). Identification of a crystal cell-specific enhancer of the black cells  
1341 prophenoloxidase gene in *Drosophila*. *Genesis* *45*, 200-207.
- 1342 Galloway, J.L., and Zon, L.I. (2003). Ontogeny of hematopoiesis: examining the  
1343 emergence of hematopoietic cells in the vertebrate embryo. *Curr Top Dev Biol*  
1344 *53*, 139-158.
- 1345 Ghosh, S., Singh, A., Mandal, S., and Mandal, L. (2015). Active hematopoietic hubs  
1346 in *Drosophila* adults generate hemocytes and contribute to immune response.  
1347 *Dev Cell* *33*, 478-488.
- 1348 Gold, K.S., and Bruckner, K. (2014). *Drosophila* as a model for the two myeloid  
1349 blood cell systems in vertebrates. *Exp Hematol* *42*, 717-727.
- 1350 Grigorian, M., Mandal, L., and Hartenstein, V. (2011). Hematopoiesis at the onset  
1351 of metamorphosis: terminal differentiation and dissociation of the *Drosophila*  
1352 lymph gland. *Dev Genes Evol* *221*, 121-131.
- 1353 Hanzelmann, S., Castelo, R., and Guinney, J. (2013). GSEA: gene set variation  
1354 analysis for microarray and RNA-seq data. *BMC Bioinformatics* *14*, 7.
- 1355 Hao, Y., and Jin, L.H. (2017). Dual role for Jumu in the control of hematopoietic  
1356 progenitors in the *Drosophila* lymph gland. *Elife* *6*.
- 1357 Hartenstein, V. (2006). Blood cells and blood cell development in the animal  
1358 kingdom. *Annu Rev Cell Dev Biol* *22*, 677-712.
- 1359 Hillyer, J.F., Schmidt, S.L., and Christensen, B.M. (2003). Hemocyte-mediated  
1360 phagocytosis and melanization in the mosquito *Armigeres subalbatus* following  
1361 immune challenge by bacteria. *Cell Tissue Res* *313*, 117-127.
- 1362 Holz, A., Bossinger, B., Strasser, T., Janning, W., and Klapper, R. (2003). The two  
1363 origins of hemocytes in *Drosophila*. *Development* *130*, 4955-4962.
- 1364 Honti, V., Csordas, G., Kurucz, E., Markus, R., and Ando, I. (2014). The cell-  
1365 mediated immunity of *Drosophila melanogaster*: hemocyte lineages, immune  
1366 compartments, microanatomy and regulation. *Dev Comp Immunol* *42*, 47-56.
- 1367 Hu, Y., Flockhart, I., Vinayagam, A., Bergwitz, C., Berger, B., Perrimon, N., and  
1368 Mohr, S.E. (2011). An integrative approach to ortholog prediction for disease-  
1369 focused and other functional studies. *BMC Bioinformatics* *12*, 357.

- 1370 Irving, P., Ubeda, J.M., Doucet, D., Troxler, L., Lagueux, M., Zachary, D., Hoffmann,  
1371 J.A., Hetru, C., and Meister, M. (2005). New insights into *Drosophila* larval  
1372 haemocyte functions through genome-wide analysis. *Cell Microbiol* 7, 335-350.
- 1373 Jung, S.H., Evans, C.J., Uemura, C., and Banerjee, U. (2005). The *Drosophila* lymph  
1374 gland as a developmental model of hematopoiesis. *Development* 132, 2521-2533.
- 1375 Kocks, C., Cho, J.H., Nehme, N., Ulvila, J., Pearson, A.M., Meister, M., Strom, C.,  
1376 Conto, S.L., Hetru, C., Stuart, L.M., *et al.* (2005). Eater, a transmembrane protein  
1377 mediating phagocytosis of bacterial pathogens in *Drosophila*. *Cell* 123, 335-346.
- 1378 Kroeger, P.T., Jr., Tokusumi, T., and Schulz, R.A. (2012). Transcriptional  
1379 regulation of eater gene expression in *Drosophila* blood cells. *Genesis* 50, 41-49.
- 1380 Krzemien, J., Dubois, L., Makki, R., Meister, M., Vincent, A., and Crozatier, M.  
1381 (2007). Control of blood cell homeostasis in *Drosophila* larvae by the posterior  
1382 signalling centre. *Nature* 446, 325-328.
- 1383 Krzemien, J., Oyallon, J., Crozatier, M., and Vincent, A. (2010). Hematopoietic  
1384 progenitors and hemocyte lineages in the *Drosophila* lymph gland. *Dev Biol* 346,  
1385 310-319.
- 1386 Kurucz, E., Markus, R., Zsomboki, J., Folkl-Medzihradzsky, K., Darula, Z., Vilmos,  
1387 P., Udvardy, A., Krausz, I., Lukacsovich, T., Gateff, E., *et al.* (2007). Nimrod, a  
1388 putative phagocytosis receptor with EGF repeats in *Drosophila* plasmatocytes.  
1389 *Curr Biol* 17, 649-654.
- 1390 Lanot, R., Zachary, D., Holder, F., and Meister, M. (2001). Postembryonic  
1391 hematopoiesis in *Drosophila*. *Dev Biol* 230, 243-257.
- 1392 Lebestky, T., Chang, T., Hartenstein, V., and Banerjee, U. (2000). Specification of  
1393 *Drosophila* hematopoietic lineage by conserved transcription factors. *Science*  
1394 288, 146-149.
- 1395 Lebestky, T., Jung, S.H., and Banerjee, U. (2003). A Serrate-expressing signaling  
1396 center controls *Drosophila* hematopoiesis. *Genes Dev* 17, 348-353.
- 1397 Leitao, A.B., and Sucena, E. (2015). *Drosophila* sessile hemocyte clusters are true  
1398 hematopoietic tissues that regulate larval blood cell differentiation. *Elife* 4.
- 1399 Lemaitre, B., and Hoffmann, J. (2007). The host defense of *Drosophila*  
1400 *melanogaster*. *Annu Rev Immunol* 25, 697-743.
- 1401 Li, A.C., and Glass, C.K. (2002). The macrophage foam cell as a target for  
1402 therapeutic intervention. *Nat Med* 8, 1235-1242.
- 1403 Llamazares, S., Moreira, A., Tavares, A., Girdham, C., Spruce, B.A., Gonzalez, C.,  
1404 Karess, R.E., Glover, D.M., and Sunkel, C.E. (1991). polo encodes a protein kinase  
1405 homolog required for mitosis in *Drosophila*. *Genes Dev* 5, 2153-2165.
- 1406 Macosko, E.Z., Basu, A., Satija, R., Nemesh, J., Shekhar, K., Goldman, M., Tirosh, I.,  
1407 Bialas, A.R., Kamitaki, N., Martersteck, E.M., *et al.* (2015). Highly Parallel Genome-  
1408 wide Expression Profiling of Individual Cells Using Nanoliter Droplets. *Cell* 161,  
1409 1202-1214.
- 1410 Madhwal, S., Shin, M., Joshi, M.K., Kapoor, A., Ur Rehman, P.M., Gor, K., Shim, J.,  
1411 and Mukherjee, T. (2019). Metabolic control of immune-competency by odors in  
1412 *Drosophila*. bioRxiv, 718056.
- 1413 Makhijani, K., Alexander, B., Tanaka, T., Rulifson, E., and Bruckner, K. (2011). The  
1414 peripheral nervous system supports blood cell homing and survival in the  
1415 *Drosophila* larva. *Development* 138, 5379-5391.
- 1416 Mandal, L., Banerjee, U., and Hartenstein, V. (2004). Evidence for a fruit fly  
1417 hemangioblast and similarities between lymph-gland hematopoiesis in fruit fly  
1418 and mammal aorta-gonadal-mesonephros mesoderm. *Nat Genet* 36, 1019-1023.

- 1419 Mandal, L., Martinez-Agosto, J.A., Evans, C.J., Hartenstein, V., and Banerjee, U.  
1420 (2007). A Hedgehog- and Antennapedia-dependent niche maintains *Drosophila*  
1421 haematopoietic precursors. *Nature* *446*, 320-324.
- 1422 Markus, R., Laurinyecz, B., Kurucz, E., Honti, V., Bajusz, I., Sipos, B., Somogyi, K.,  
1423 Kronhamn, J., Hultmark, D., and Ando, I. (2009). Sessile hemocytes as a  
1424 hematopoietic compartment in *Drosophila melanogaster*. *Proc Natl Acad Sci U S*  
1425 *A* *106*, 4805-4809.
- 1426 Mathieu, J., Cauvin, C., Moch, C., Radford, S.J., Sampaio, P., Perdigoto, C.N.,  
1427 Schweisguth, F., Bardin, A.J., Sunkel, C.E., McKim, K., *et al.* (2013). Aurora B and  
1428 cyclin B have opposite effects on the timing of cytokinesis abscission in  
1429 *Drosophila* germ cells and in vertebrate somatic cells. *Dev Cell* *26*, 250-265.
- 1430 Minakhina, S., and Steward, R. (2010a). Hematopoietic stem cells in  
1431 *Drosophila*. *Development* *137*, 27-31.
- 1432 Minakhina, S., and Steward, R. (2010b). Hematopoietic stem cells in *Drosophila*.  
1433 *Development* *137*, 27-31.
- 1434 Mondal, B.C., Mukherjee, T., Mandal, L., Evans, C.J., Sinenko, S.A., Martinez-Agosto,  
1435 J.A., and Banerjee, U. (2011). Interaction between differentiating cell- and niche-  
1436 derived signals in hematopoietic progenitor maintenance. *Cell* *147*, 1589-1600.
- 1437 Moore, K.J., Sheedy, F.J., and Fisher, E.A. (2013). Macrophages in atherosclerosis:  
1438 a dynamic balance. *Nature Reviews Immunology* *13*, 709-721.
- 1439 Nagarkar-Jaiswal, S., Lee, P.T., Campbell, M.E., Chen, K., Anguiano-Zarate, S.,  
1440 Gutierrez, M.C., Busby, T., Lin, W.W., He, Y., Schulze, K.L., *et al.* (2015). A library of  
1441 MiMICs allows tagging of genes and reversible, spatial and temporal knockdown  
1442 of proteins in *Drosophila*. *Elife* *4*.
- 1443 Owusu-Ansah, E., and Banerjee, U. (2009). Reactive oxygen species prime  
1444 *Drosophila* haematopoietic progenitors for differentiation. *Nature* *461*, 537-541.
- 1445 Parry, D.H., and O'Farrell, P.H. (2001). The schedule of destruction of three  
1446 mitotic cyclins can dictate the timing of events during exit from mitosis. *Curr Biol*  
1447 *11*, 671-683.
- 1448 Petraki, S., Alexander, B., and Bruckner, K. (2015). Assaying Blood Cell  
1449 Populations of the *Drosophila melanogaster* Larva. *J Vis Exp*.
- 1450 Qiu, X., Mao, Q., Tang, Y., Wang, L., Chawla, R., Pliner, H.A., and Trapnell, C. (2017).  
1451 Reversed graph embedding resolves complex single-cell trajectories. *Nat*  
1452 *Methods* *14*, 979-982.
- 1453 Regan, J.C., Brandao, A.S., Leitao, A.B., Mantas Dias, A.R., Sucena, E., Jacinto, A., and  
1454 Zaidman-Remy, A. (2013). Steroid hormone signaling is essential to regulate  
1455 innate immune cells and fight bacterial infection in *Drosophila*. *PLoS Pathog* *9*,  
1456 e1003720.
- 1457 Rizki, R.M., and Rizki, T.M. (1984). Selective destruction of a host blood cell type  
1458 by a parasitoid wasp. *Proc Natl Acad Sci U S A* *81*, 6154-6158.
- 1459 Rozenblatt-Rosen, O., Stubbington, M.J.T., Regev, A., and Teichmann, S.A. (2017).  
1460 The Human Cell Atlas: from vision to reality. *Nature* *550*, 451-453.
- 1461 Sadasivam, S., and DeCaprio, J.A. (2013). The DREAM complex: master  
1462 coordinator of cell cycle-dependent gene expression. *Nat Rev Cancer* *13*, 585-  
1463 595.
- 1464 Sakaguchi, S., Miyara, M., Costantino, C.M., and Hafler, D.A. (2010). FOXP3+  
1465 regulatory T cells in the human immune system. *Nat Rev Immunol* *10*, 490-500.
- 1466 Sanchez Bosch, P., Makhijani, K., Herboso, L., Gold, K.S., Baginsky, R., Woodcock,  
1467 K.J., Alexander, B., Kukar, K., Corcoran, S., Jacobs, T., *et al.* (2019). Adult

1468 *Drosophila* Lack Hematopoiesis but Rely on a Blood Cell Reservoir at the  
1469 Respiratory Epithelia to Relay Infection Signals to Surrounding Tissues. *Dev Cell*.  
1470 Sharma, S.K., Ghosh, S., Geetha, A.R., Mandal, S., and Mandal, L. (2019). Cell  
1471 Adhesion-Mediated Actomyosin Assembly Regulates the Activity of Cubitus  
1472 Interruptus for Hematopoietic Progenitor Maintenance in *Drosophila*. *Genetics*  
1473 *212*, 1279-1300.  
1474 Shim, J., Mukherjee, T., Mondal, B.C., Liu, T., Young, G.C., Wijewarnasuriya, D.P.,  
1475 and Banerjee, U. (2013). Olfactory control of blood progenitor maintenance. *Cell*  
1476 *155*, 1141-1153.  
1477 Sorrentino, R.P., Carton, Y., and Govind, S. (2002). Cellular Immune Response to  
1478 Parasite Infection in the *Drosophila* Lymph Gland Is Developmentally Regulated.  
1479 *Developmental Biology* *243*, 65-80.  
1480 Sorrentino, R.P., Tokusumi, T., and Schulz, R.A. (2007). The Friend of GATA  
1481 protein U-shaped functions as a hematopoietic tumor suppressor in *Drosophila*.  
1482 *Dev Biol* *311*, 311-323.  
1483 Stuart, T., Butler, A., Hoffman, P., Hafemeister, C., Papalexi, E., Mauck, W.M., 3rd,  
1484 Hao, Y., Stoeckius, M., Smibert, P., and Satija, R. (2019). Comprehensive  
1485 Integration of Single-Cell Data. *Cell* *177*, 1888-1902 e1821.  
1486 Tang, H., Kambris, Z., Lemaitre, B., and Hashimoto, C. (2006). Two proteases  
1487 defining a melanization cascade in the immune system of *Drosophila*. *J Biol Chem*  
1488 *281*, 28097-28104.  
1489 Tepass, U., Fessler, L.I., Aziz, A., and Hartenstein, V. (1994). Embryonic origin of  
1490 hemocytes and their relationship to cell death in *Drosophila*. *Development* *120*,  
1491 1829-1837.  
1492 Tikhonova, A.N., Dolgalev, I., Hu, H., Sivaraj, K.K., Hoxha, E., Cuesta-Dominguez, A.,  
1493 Pinho, S., Akhmetzyanova, I., Gao, J., Witkowski, M., *et al.* (2019). The bone  
1494 marrow microenvironment at single-cell resolution. *Nature* *569*, 222-228.  
1495 Tokusumi, T., Sorrentino, R.P., Russell, M., Ferrarese, R., Govind, S., and Schulz,  
1496 R.A. (2009). Characterization of a lamellocyte transcriptional enhancer located  
1497 within the misshapen gene of *Drosophila melanogaster*. *PLoS One* *4*, e6429.  
1498 Trapnell, C., Cacchiarelli, D., Grimsby, J., Pokharel, P., Li, S., Morse, M., Lennon, N.J.,  
1499 Livak, K.J., Mikkelsen, T.S., and Rinn, J.L. (2014). The dynamics and regulators of  
1500 cell fate decisions are revealed by pseudotemporal ordering of single cells. *Nat*  
1501 *Biotechnol* *32*, 381-386.  
1502 van der Maaten, L.J.P., and Hinton, G.E. (2008). Visualizing High-Dimensional  
1503 Data Using t-SNE. *Journal of Machine Learning Research* *9*, 2579 - 2605.  
1504 Weissman, I.L., Anderson, D.J., and Gage, F. (2001). Stem and progenitor cells:  
1505 origins, phenotypes, lineage commitments, and transdifferentiations. *Annu Rev*  
1506 *Cell Dev Biol* *17*, 387-403.  
1507 Wolock, S.L., Lopez, R., and Klein, A.M. (2019). Scrublet: Computational  
1508 Identification of Cell Doublets in Single-Cell Transcriptomic Data. *Cell Syst* *8*,  
1509 281-291 e289.  
1510 Xavier, M.J., and Williams, M.J. (2011). The Rho-family GTPase Rac1 regulates  
1511 integrin localization in *Drosophila* immunosurveillance cells. *PLoS One* *6*,  
1512 e19504.  
1513 Yang, H., Kronhamn, J., Ekstrom, J.O., Korkut, G.G., and Hultmark, D. (2015).  
1514 JAK/STAT signaling in *Drosophila* muscles controls the cellular immune  
1515 response against parasitoid infection. *EMBO Rep* *16*, 1664-1672.

- 1516 Yoon, S., Cho, B., Shin, M., Koranteng, F., Cha, N., and Shim, J. (2017). Iron  
1517 Homeostasis Controls Myeloid Blood Cell Differentiation in *Drosophila*. *Mol Cells*  
1518 *40*, 976-985.
- 1519 Yu, S., Luo, F., and Jin, L.H. (2018). The *Drosophila* lymph gland is an ideal model  
1520 for studying hematopoiesis. *Dev Comp Immunol* *83*, 60-69.
- 1521 Zielke, N., and Edgar, B.A. (2015). FUCCI sensors: powerful new tools for analysis  
1522 of cell proliferation. *WIREs Developmental Biology* *4*, 469-487.
- 1523

## Figure 1

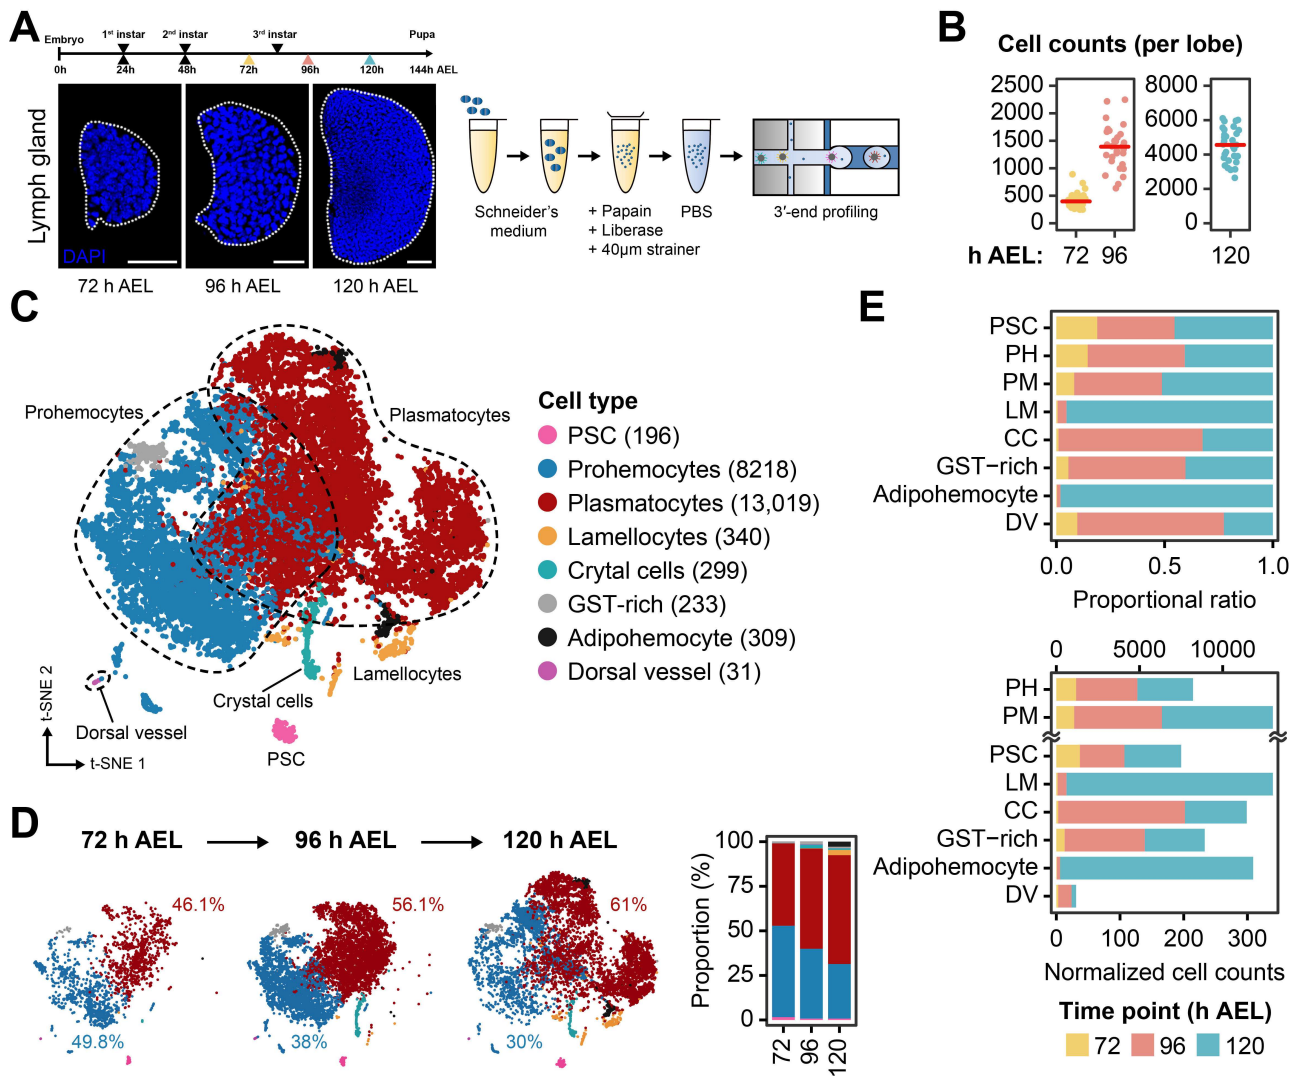

## Figure 2

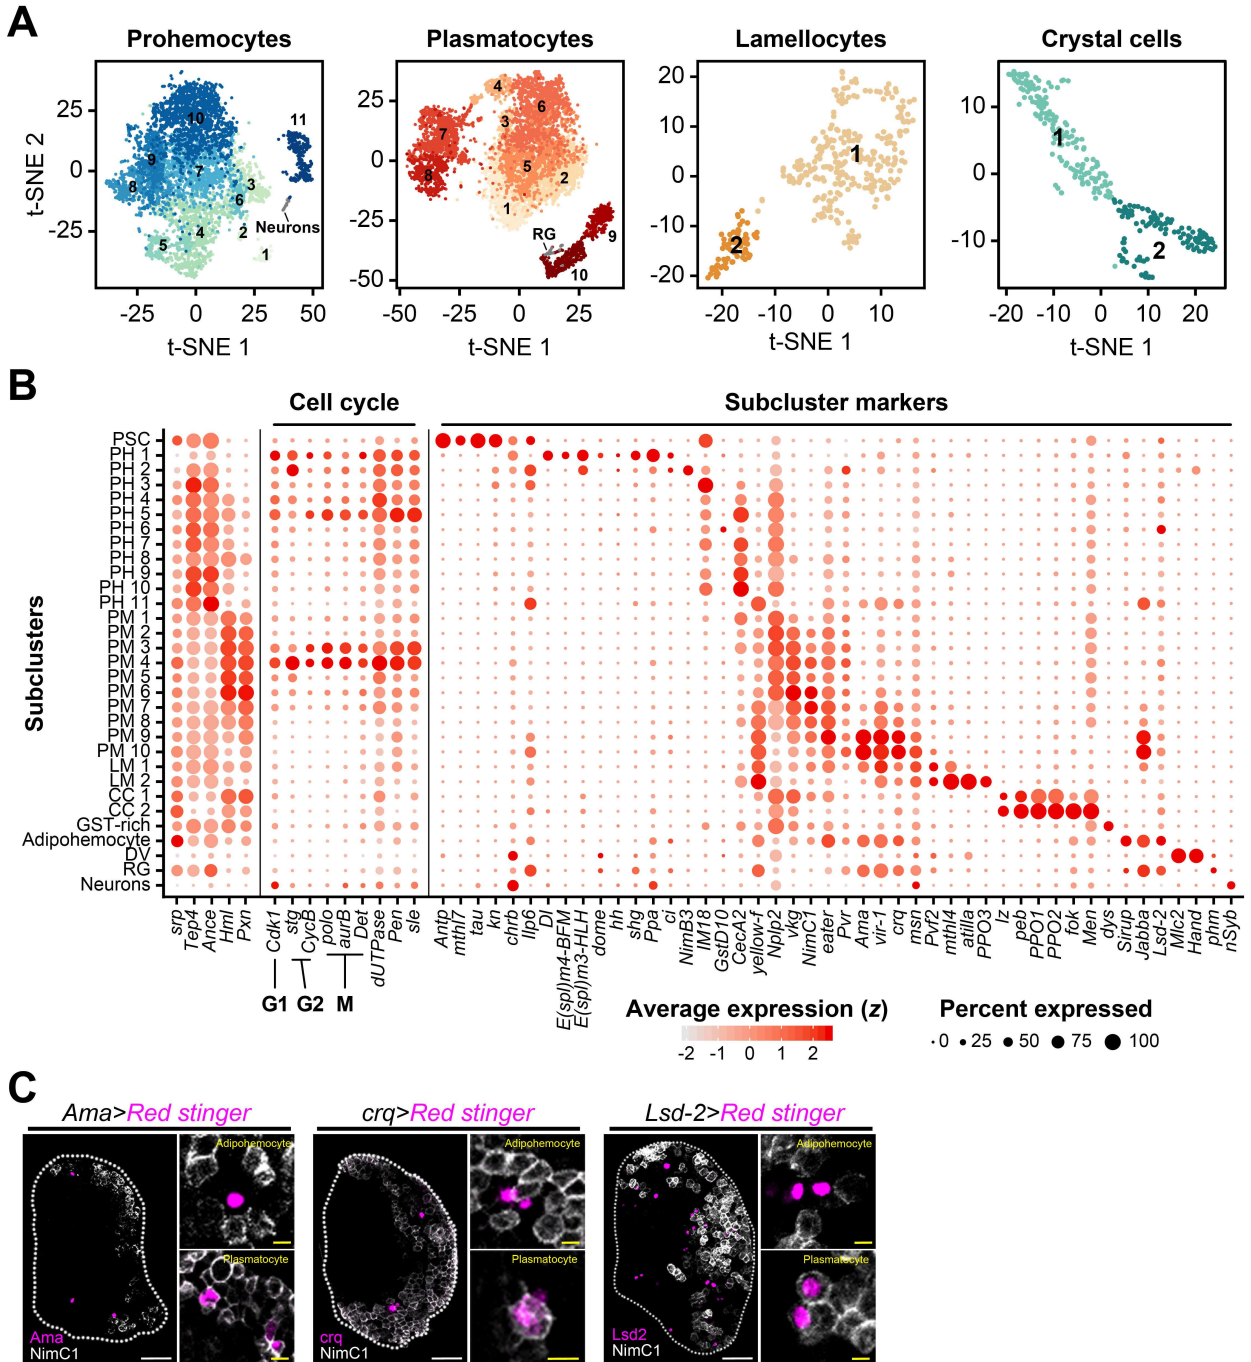



### Figure 3

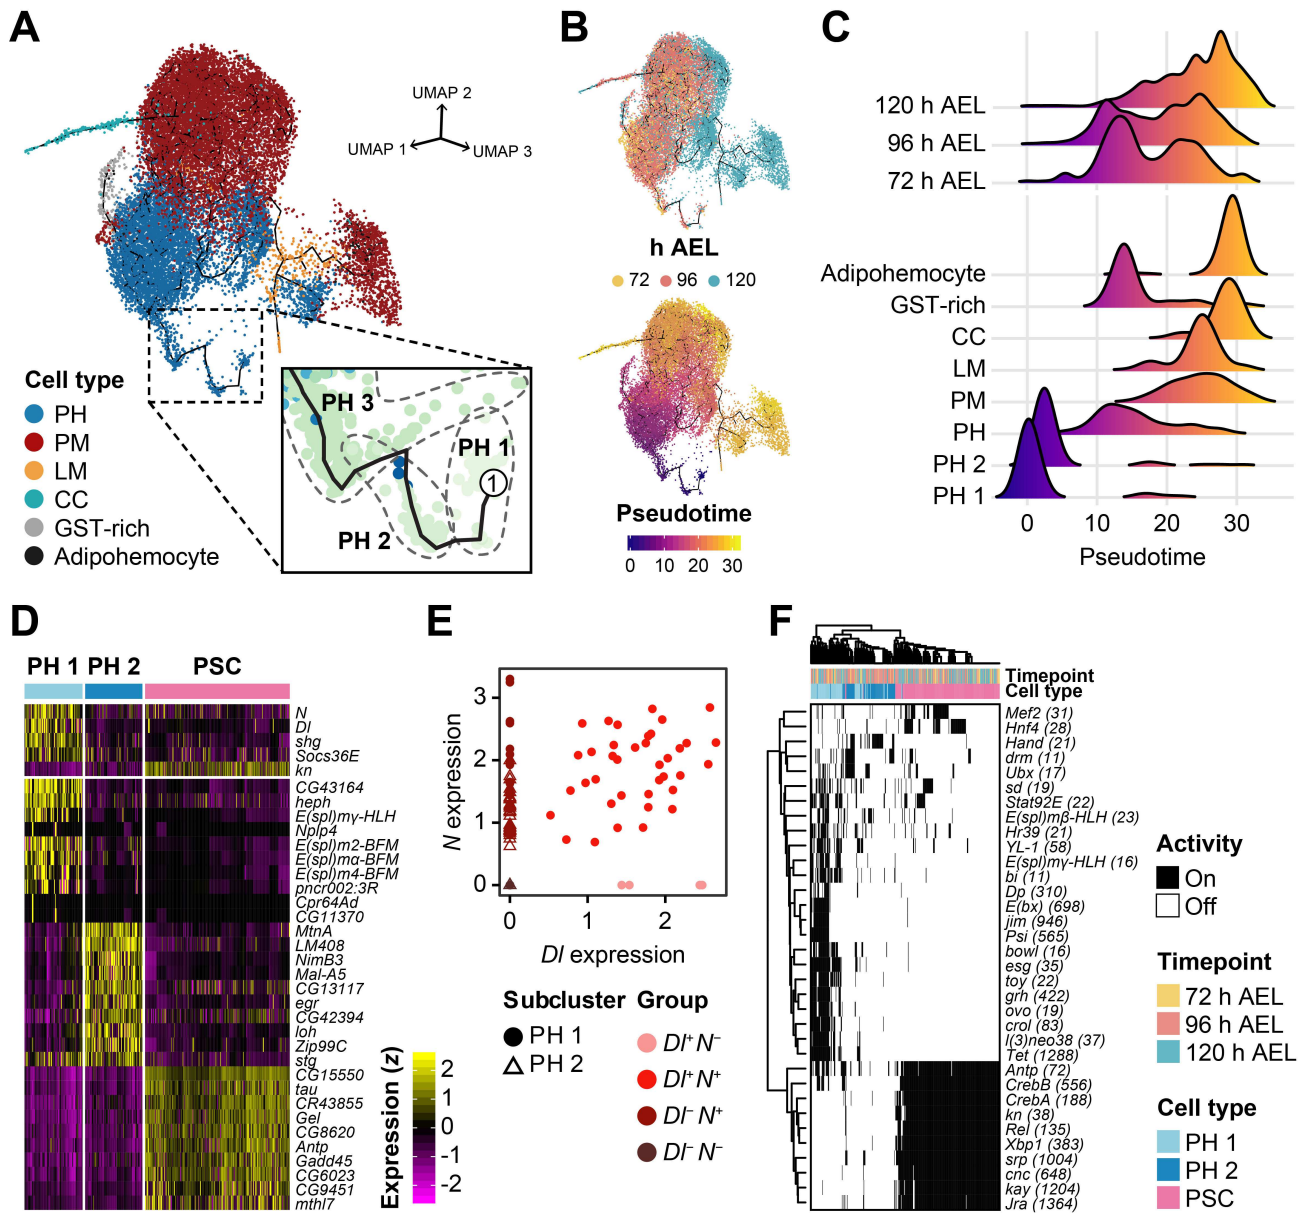

## Figure 4

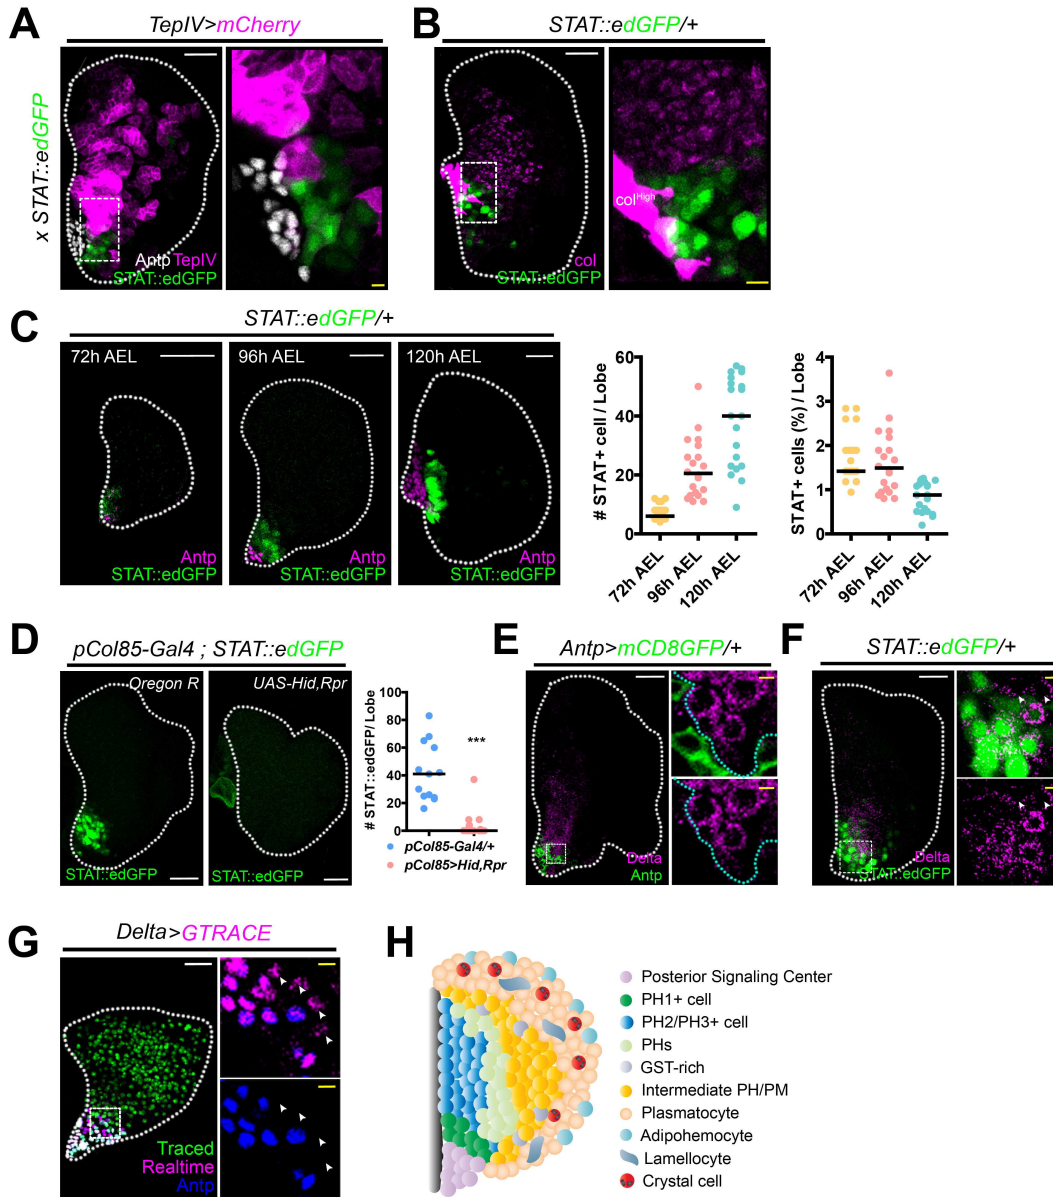

## Figure 5

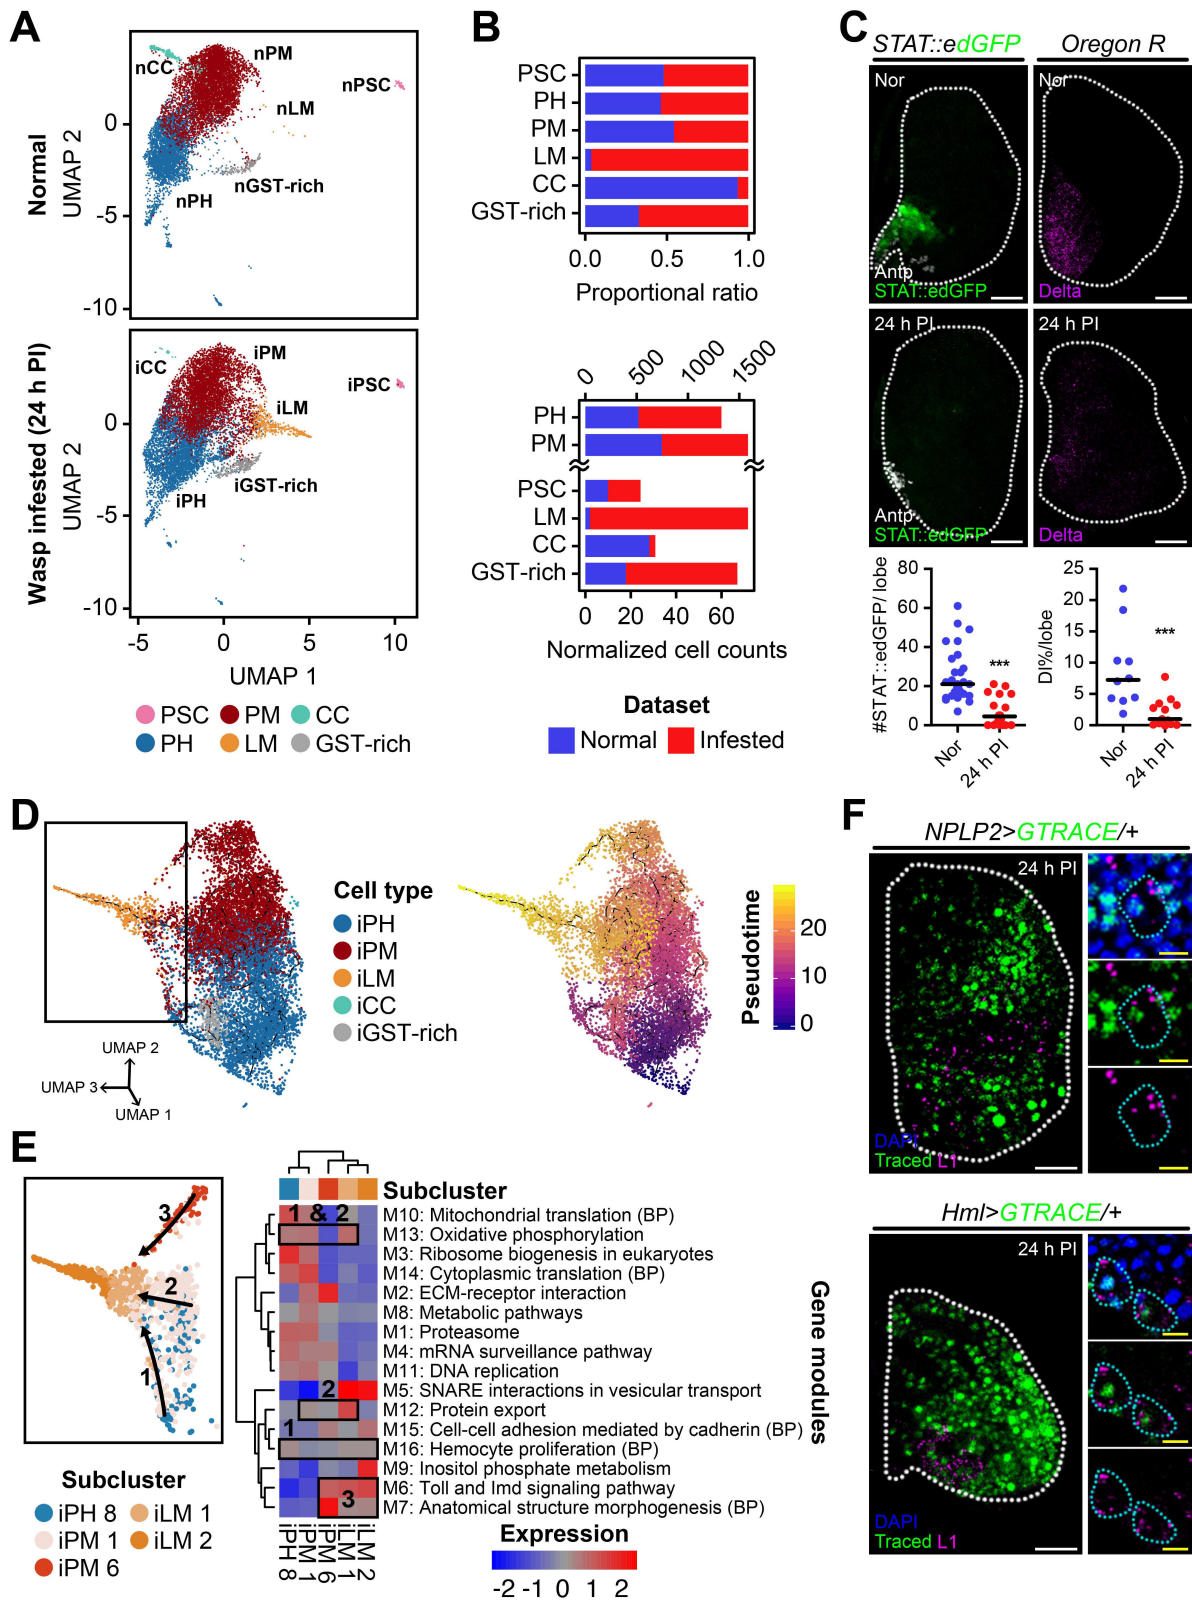

## Figure 6

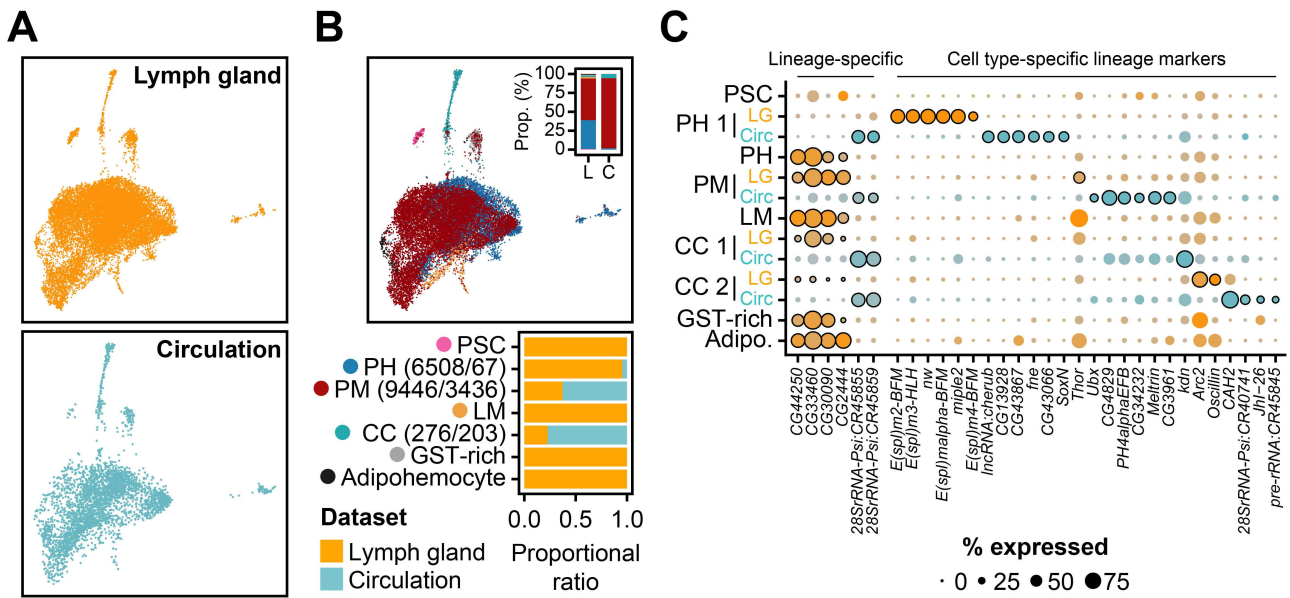

## Figure 7

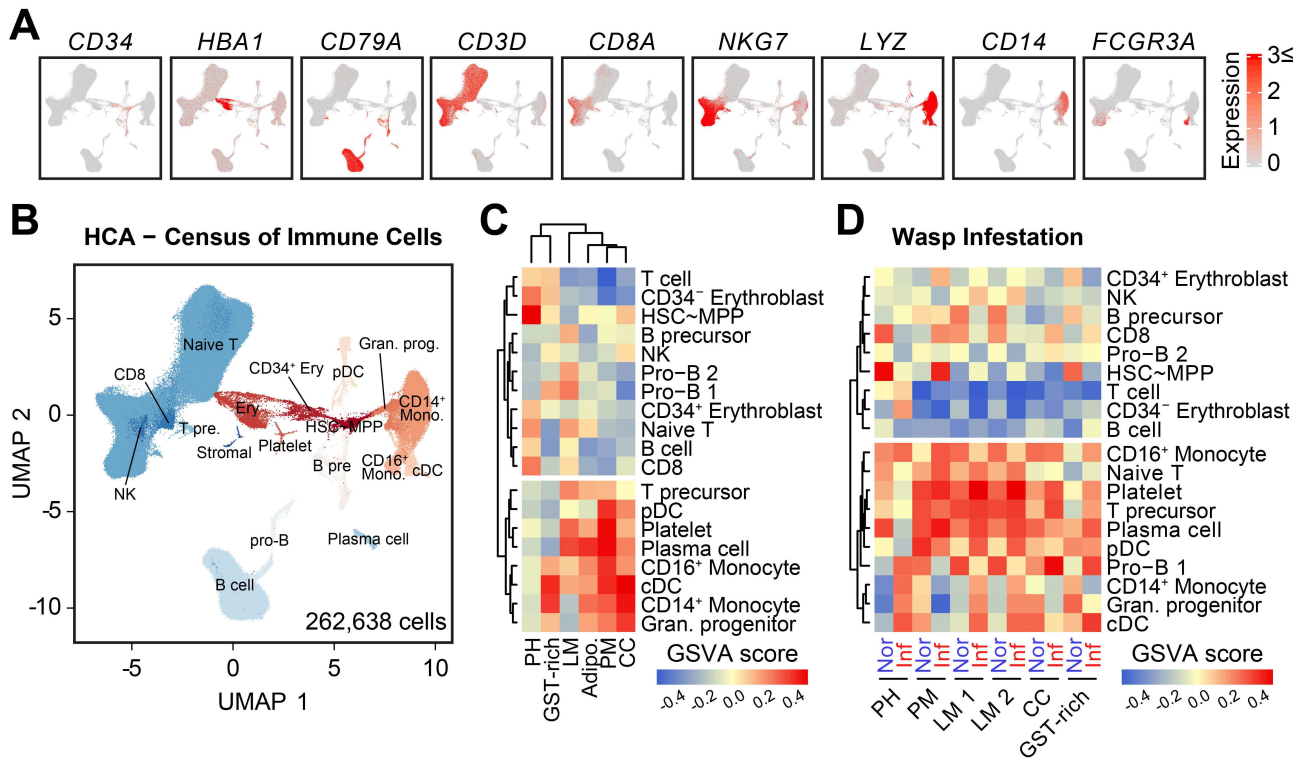

Source: https://biorxiv.org/content/biorxiv/early/2020/01/15/2020.01.15.908350.full-text.pdf
